## **This PDF contains the following sections:**

|                                     |    |
|-------------------------------------|----|
| Title page                          | 1  |
| Abstract                            | 2  |
| Graphical abstract                  | 3  |
| Highlights                          | 4  |
| Introduction                        | 5  |
| Results (incl. Figures and legends) | 6  |
| Discussion                          | 16 |
| Methods                             | 19 |
| Data availability                   | 26 |
| Acknowledgements                    | 26 |
| Author contributions                | 27 |
| Conflict of interest                | 27 |
| References                          | 27 |
| Supporting Information              | 36 |

1

## 2 **Long-term effects of early postnatal stress on Sertoli cells functions**

3

4 Kristina M. Thumfart<sup>1,2</sup>, Samuel Lazzeri<sup>1,2,#a,#b</sup>, Francesca Manuella<sup>1,2</sup>, Isabelle M. Mansuy<sup>1,2\*</sup>

5

6 <sup>1</sup>Laboratory of Neuroepigenetics, Institute for Neuroscience, Department of Health Sciences  
7 and Technology, ETH Zurich, Zurich, Switzerland

8 <sup>2</sup>Laboratory of Neuroepigenetics, Brain Research Institute, Medical Faculty of the University  
9 of Zurich, Zurich, Switzerland

10 <sup>#a</sup>Current address: IFOM, FIRC Institute of Molecular Oncology, Milan, Italy

11 <sup>#b</sup>Current address: University of Milan, Department of Oncology and Hemato-oncology, Milan,  
12 Italy

13

14 \*Corresponding author

15 Email: [imansuy@ethz.ch](mailto:imansuy@ethz.ch) (IMM)

16

17

## 18 **Abstract**

19 Sertoli cells are somatic cells in testes essential for spermatogenesis, as they support the  
20 development, maturation, and differentiation of germ cells. Sertoli cells are metabolically  
21 highly active and physiologically regulated by external signals, particularly factors in the  
22 blood stream. In disease conditions, circulating pathological signals may affect Sertoli cells  
23 and consequentially, alter germ cells and fertility. While the effects of stress on reproductive  
24 cells have been well studied, how Sertoli cells respond to stress remains poorly  
25 characterized. Therefore, we used a mouse model of early postnatal stress to assess the  
26 effects of stress on Sertoli cells. We developed an improved enrichment strategy based on  
27 intracellular stainings and obtained enriched preparations of adult Sertoli cells from exposed  
28 males. We show that adult Sertoli cells have impaired electron transport chain (ETC)  
29 pathways and that several components of ETC complexes I, III, and IV are persistently  
30 affected. We identify the circulation as a potential mediator of the effects of stress, since  
31 treatment of primary Sertoli cells with serum from stressed males induces similar ETC  
32 alterations. These results newly highlight Sertoli cells as cellular targets of early life stress,  
33 and suggest that they may contribute to the negative effects of stress on fertility.

34

### 35 **Keywords**

36 Sertoli cell, adult testis, electron transport chain, mitochondria, early postnatal stress, mice

## 37 Graphical abstract

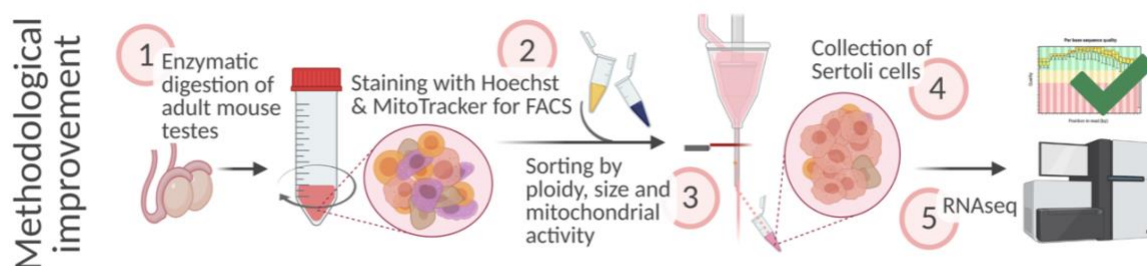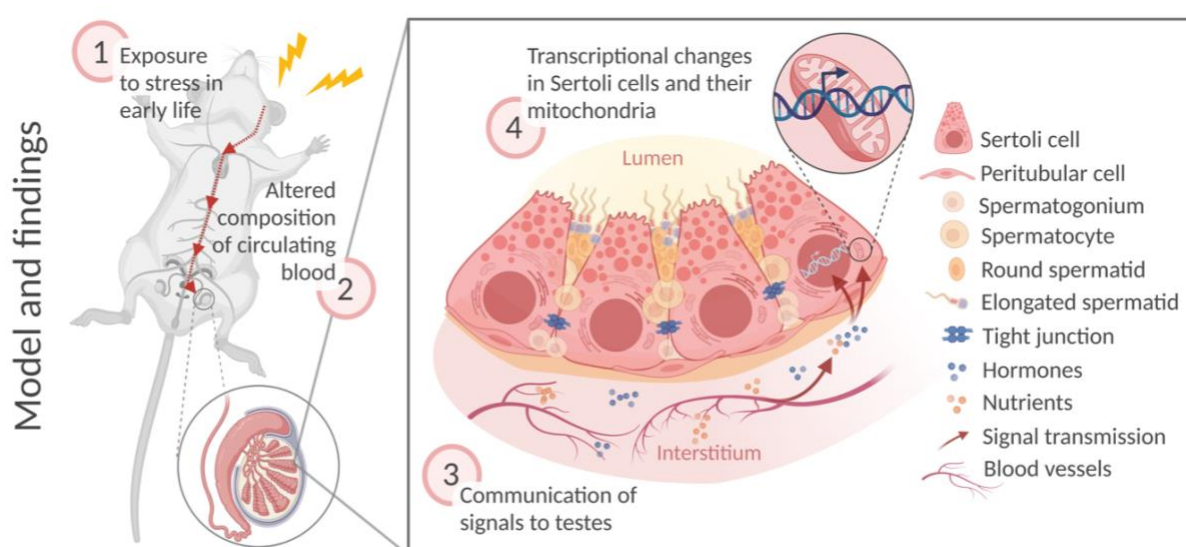

38

## 39 **Highlights**

- 40 • We present an improved method to obtain enriched preparations of Sertoli cells from  
41 adult mouse testis for molecular analyses
- 42 • Sertoli cells from adult males exposed to stress during early postnatal life have  
43 altered electron transport chain (ETC) expression, suggesting persistent effects of  
44 early life stress on Sertoli cells physiology
- 45 • Serum from adult males exposed to early postnatal stress reproduces ETC gene  
46 dysregulation in cultured Sertoli cells.

47

48

## 49 Introduction

50 Sertoli cells are somatic cells in the seminiferous tubules of testes tightly associated with germ  
51 cells and essential for spermatogenesis. They provide physical and structural support to  
52 differentiating spermatogenic cells and form and maintain a protective blood-testis barrier  
53 (Griswold 2018). Sertoli cells have paracrine functions and secrete growth factors, hormones,  
54 cytokines, and extracellular vesicles (Mancuso et al. 2018). These factors provide  
55 developmental guidance and immunological protection to germ cells (Mäkelä and Hobbs  
56 2019; Kaur et al. 2020). Sertoli cells have a high glycolytic flux to provide nutritional support  
57 for germ cells. Through glycolysis, they metabolize glucose into lactate, which is the primary  
58 source of energy for spermatocytes and spermatids (Zhang et al. 2018). For their own energy  
59 needs, Sertoli cells rely on oxidative phosphorylation of lipids, which they receive through the  
60 blood stream or through the recycling of germ cell waste material (Regueira et al. 2018).  
61 Oxidative phosphorylation is catalyzed by four complexes of the electron transport chain  
62 (ETC) located in the mitochondrial inner membrane. These complexes use energy generated  
63 from nutrient oxidation to create a proton gradient across the mitochondrial inner membrane,  
64 which is then used by the ATP-synthase (complex V) to generate ATP (Nolfi-Donagan,  
65 Braganza, and Shiva 2020).

66 Sertoli cells are in close contact with blood vessels to sense hormones and metabolites  
67 present in the blood stream, and thereby receive signaling from circulating factors (Rebourcet  
68 et al. 2016). Changes in circulating factors in pathological conditions may therefore alter  
69 Sertoli cell metabolism and physiology and affect spermatogenic cells. This is particularly  
70 critical in early life, because Sertoli cells lose their mitotic activity during postnatal development  
71 and thus, if they are affected in early life, they are likely to remain so until adulthood (Sharpe  
72 et al. 2003). Indeed, altered blood homeostasis due to neonatal hormonal dysregulation in  
73 mice (Sarkar and Singh 2017) or early exposure to environmental toxins in rats (de Oliveira et  
74 al. 2020; Sadler-Riggelman et al. 2019) were shown to alter the energy metabolism of Sertoli  
75 cells. Exposure to high fat diet and resulting diabetes can also alter both glucose and lipid

76 metabolism of mouse Sertoli cells (Luo et al. 2020), which may contribute to altered  
77 reproductive functions in response to diabetes (Sajadi et al. 2019).

78 To gain insight into the effects of early life stress on Sertoli cells, we examined the  
79 transcriptome of Sertoli cells from adult males exposed to stress in early postnatal life using  
80 an improved method to enrich Sertoli cells from adult mouse testes. We observed that  
81 oxidative phosphorylation by the mitochondrial ETC is altered in adult Sertoli cells, and that  
82 many ETC components are affected. We further show that serum can recapitulate ETC  
83 components alterations in cultured Sertoli cells, suggesting the involvement of circulating  
84 factors in the alterations.

85

## 86 **Results**

### 87 **Enrichment of Sertoli cells from adult testis**

88 To obtain Sertoli cells from adult mouse testis, we developed an enrichment method based  
89 on fluorescence-activated cell sorting (FACS) not requiring any transgenic or surface marker  
90 (Fig 1a). First, testis tissue is digested sequentially in collagenase, trypsin and hyaluronidase  
91 (Bhushan et al. 2016), then cells are processed through FACS. While collagenase digests the  
92 interstitium and detaches seminiferous tubules from each other, trypsin fragments tubules and  
93 detaches peritubular cells. Hyaluronidase separates Sertoli cells from germ cells. The FACS  
94 strategy is based on intracellular staining with Hoechst and MitoTracker based on specific  
95 properties of Sertoli cells including diploidy (post-mitotic state) (Sharpe et al. 2003), large size  
96 (Wong and Khan 2021), and high metabolic activity compared to other cells in testes (Miettinen  
97 and Björklund 2017). Plotting of Hoechst intensity versus forward scatter (FSC), indicating  
98 size, identified several testicular subpopulations (Fig 1b). Diploid cells were separated from  
99 haploid (spermatids) and tetraploid (dividing) cells distinguished by Hoechst intensity (Fig 1c)  
100 (Gaysinskaya et al. 2014). Diploid cells were then fractionated by size using high and low FSC  
101 (Fig 1d), and cells of the high FSC fraction were separated into high and low MitoTracker

102 signal (high/low APC) for mitochondrial mass and activity (Fig 1e) (Clutton et al. 2019).  
103 Vimentin staining of single-cell suspension collected from seminiferous tubules before FACS  
104 identified  $1.9 \pm 0.6\%$  (weighted mean  $\pm$  weighted standard deviation) of Sertoli cells (Fig 1f)  
105 and after FACS,  $14.8 \pm 3.6\%$  in the fraction of diploid cells (Fig 1g). This was further increased  
106 to  $37.7 \pm 30\%$  in the high FSC cells fraction (Fig 1h) and up to  $89.8 \pm 5\%$  in the fraction of  
107 cells with a high APC signal (Fig 1i).

108

109



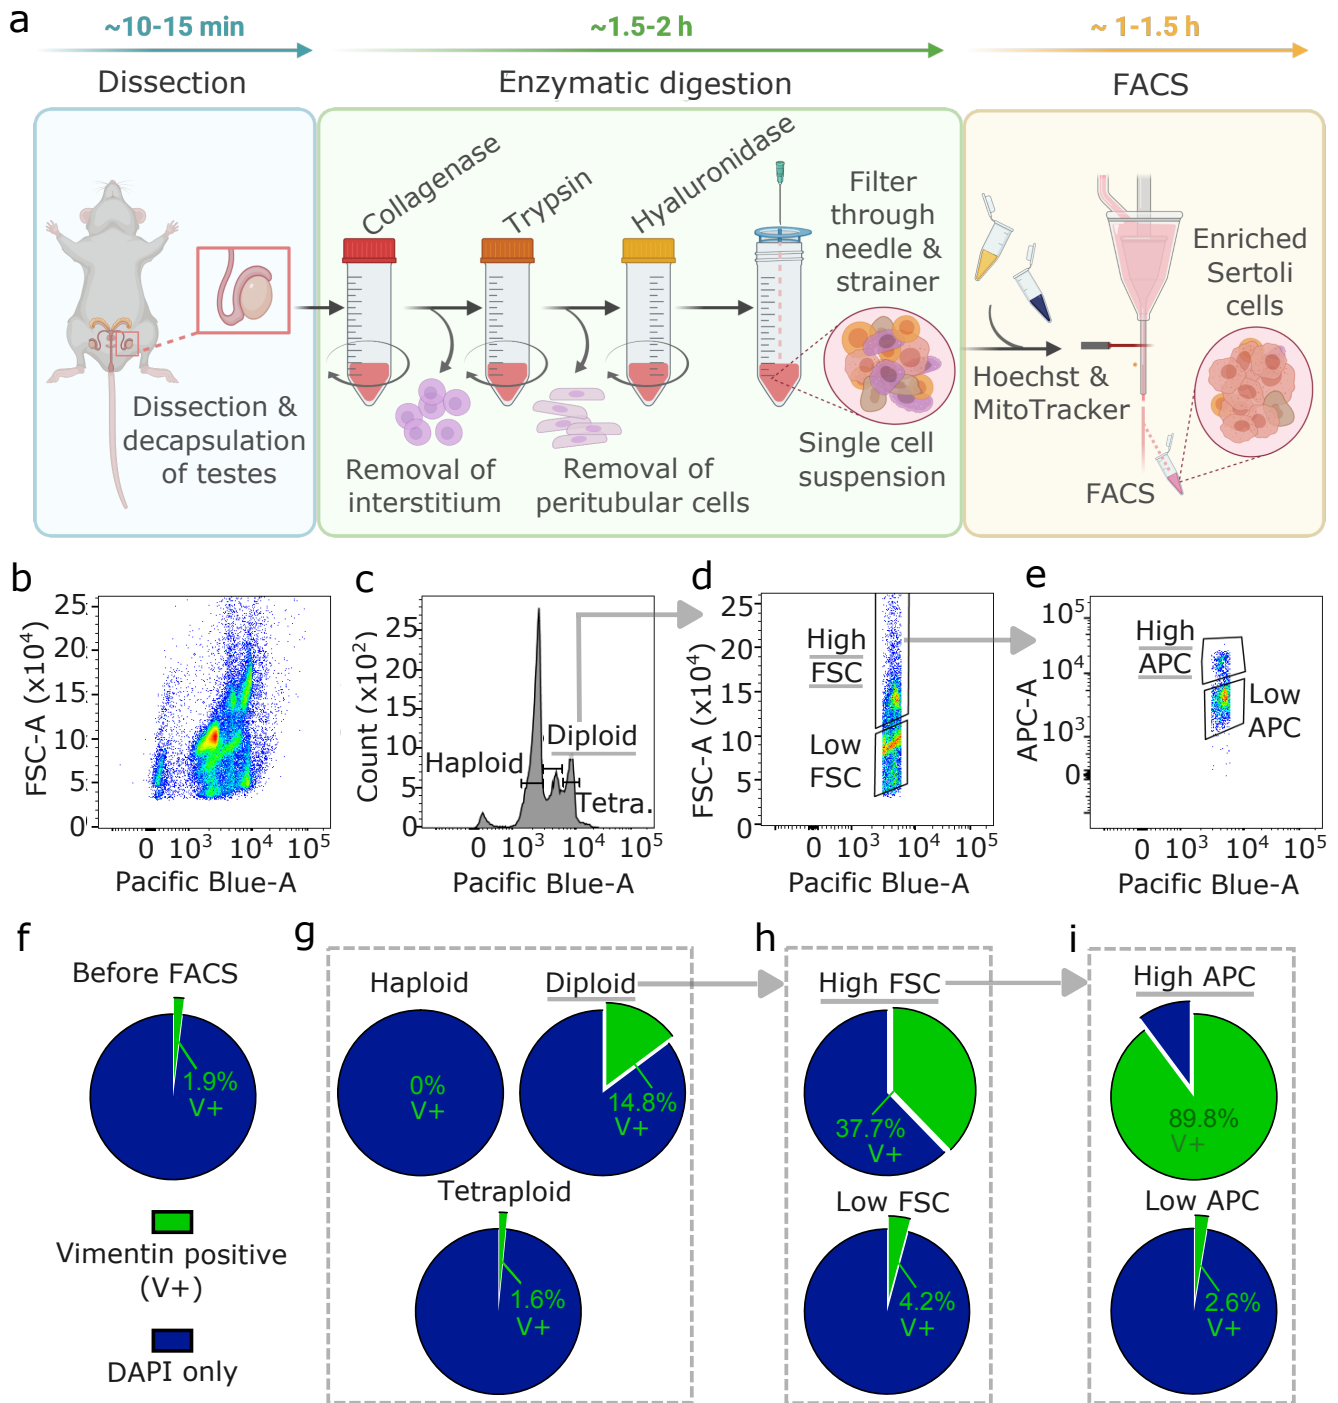

110 **Fig 1. Sertoli cells enrichment and visualization by vimentin staining.** (a) Workflow for  
111 Sertoli cells enrichment procedure including testis dissection, enzymatic digestion by  
112 collagenase, trypsin, and hyaluronidase, followed by staining with Hoechst and MitoTracker  
113 for FACS. Time estimates are indicated for the individual steps. (b-e) Results of FACS profiles  
114 during Sertoli cells enrichment. (b) Hoechst signal (Pacific Blue) plotted against FSC  
115 (indicating size) showing several cell populations in the single cell testis preparation. (c)  
116 Diploid cells selected using the Hoechst signal, (d) large cells using a high FSC signal, then  
117 (e) cells with high mitochondrial activity using MitoTracker (high APC) signal. (f-i) Enrichment  
118 of Sertoli cells (vimentin-positive, V+) in different FACS fractions. Percentage of V+ cells of all  
119 cells (DAPI) is shown (f) before FACS, (g) after selection of diploid cells, (h) after size selection  
120 by high FSC within diploid cells, and (i) after gating on high mitochondrial activity within diploid,  
121 high FSC cells (weighted averages of 4 independent replicates). Counts are summarized in  
122 S1 Table. Underlined fractions in (b-i) correspond to gates chosen for Sertoli cells enrichment.  
123 Arrows indicate implementation of gate settings before further partitioning into sub-gates.

124

## 125 **Transcriptomic profiling of enriched Sertoli cells by RNA** 126 **sequencing**

127 We characterized the transcriptome of the Sertoli cells enriched from adult mouse testis by  
128 RNA sequencing and examined known markers of testicular cell populations using published  
129 single-cell sequencing datasets (Green et al. 2018). We observed that several Sertoli cell  
130 markers including *Amhr2*, *Clu*, *Ctsl*, *Rhox5*, and *Sox9* were more abundant in the isolated  
131 cells than markers of other testicular cells, validating the enrichment protocol (Fig 2a). The top  
132 100 expressed genes were screened for enriched *Kyoto Encyclopedia of Genes and*  
133 *Genomes* (KEGG; Fig 2b) and *Gene Ontology* (GO; Fig 2c) pathways. Identified pathways  
134 involve immunological regulation, energy metabolism, cell-cell junctions, phagocytosis, and  
135 secretion, consistent with known Sertoli cell functions (Griswold 2018).

136

137

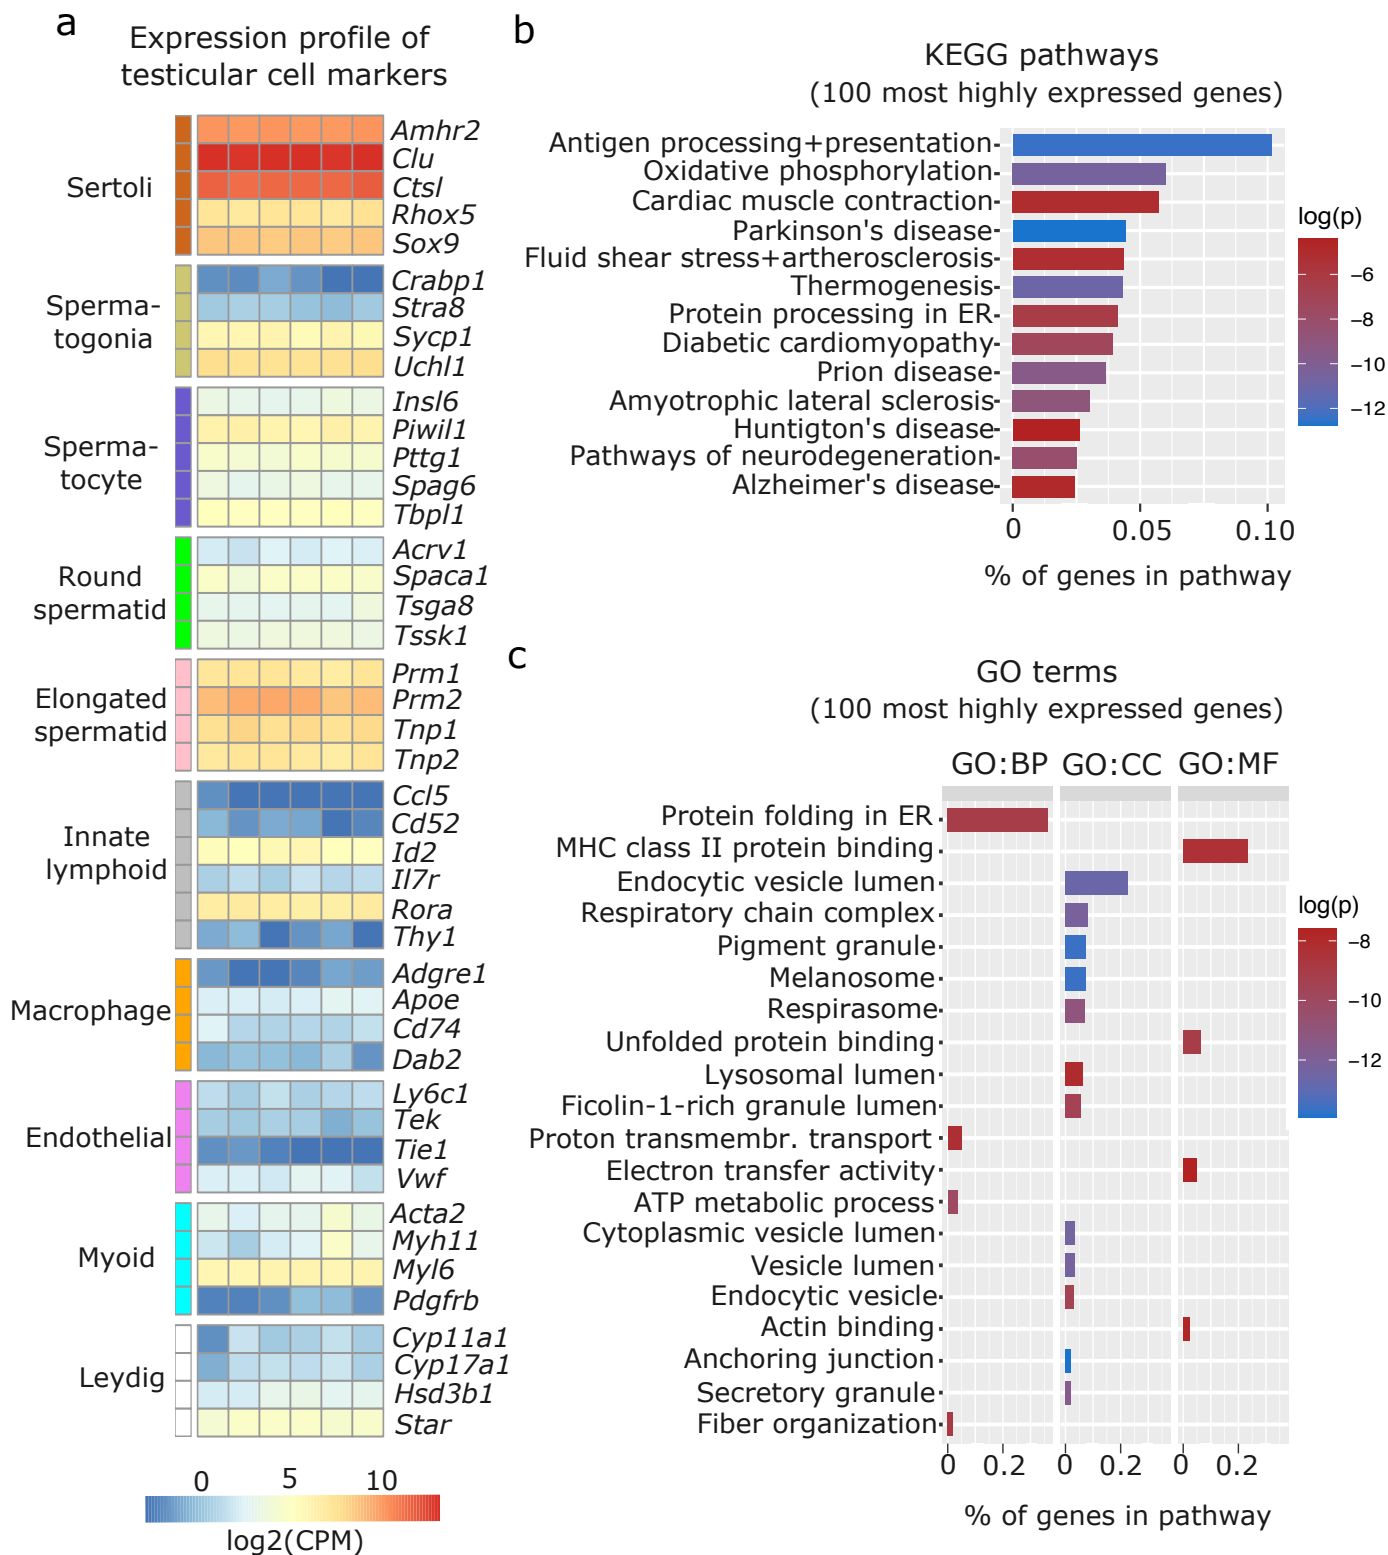

138 **Fig 2. Characterization of enriched Sertoli cells by RNA sequencing.** (a) Heatmap of  
139 testicular cell markers in enriched Sertoli cells, ordered by cell type-specificity including Sertoli  
140 cells, spermatogenic cells (spermatogonia, spermatocytes, round and elongated spermatids),  
141 immune cells (lymphoid and macrophage), endothelial cells, smooth muscle cells (peritubular  
142 myoid) and endocrine cells (Leydig). Color scale indicates normalized log<sub>2</sub> gene counts per  
143 million (CPM). Enriched (b) KEGG and (c) GO pathways for 100 most highly expressed genes  
144 in collected Sertoli cells including immunological (e.g. KEGG: Antigen processing and  
145 presentation; GO MF: MHC class II protein binding), metabolic (e.g. KEGG: Oxidative  
146 phosphorylation, GO CC: respiratory chain complex), cell-cell junction (KEGG: Cardiac  
147 muscle contraction, GO, CC: anchoring junction), phagocytosis (GO, CC: endocytic vesicle  
148 lumen, lysosomal lumen), and secretion (KEGG: protein processing in ER, GO, CC: secretory  
149 granule) pathways. Ratio of genes per pathway is given on the x-axis and log of p-value  
150 (log(p)) is indicated on a color scale. BP: biological process, CC: cellular component, MF:  
151 molecular function.

152

## 153 **Persistent changes in Sertoli cells transcriptome caused by** 154 **early life stress**

155 We used our improved enrichment method to obtain Sertoli cells from adult males exposed to  
156 stress in early postnatal life and examined the effects on the cells. As a stress paradigm, we  
157 used an established mouse model of postnatal stress based on unpredictable maternal  
158 separation combined with unpredictable maternal stress (MSUS) (Franklin et al. 2010).  
159 Newborn pups were separated from their mother unpredictably 3 hours each day from  
160 postnatal day 1 to 14 (PND1-14) and during separation, mothers were stressed unpredictably.  
161 This paradigm induces persistent metabolic and behavioral alterations in exposed animals  
162 when adult, and in their progeny across several generations (Gapp et al. 2014; Franklin et al.  
163 2010). We collected Sertoli cells from adult MSUS and control mice from two independent  
164 cohorts (batch 1 and 2) and profiled their transcriptome by RNA sequencing in batch 1,  
165 followed by validation by quantitative PCR in batch 2 (Fig 3a). Using over-representation  
166 analyses of all genes with a p-value <0.05 from the RNA sequencing datasets, we observed  
167 that the most significantly altered molecular pathways (top five) were related to the  
168 mitochondrial ETC (S2 Table). Among KEGG pathways, “oxidative phosphorylation”  
169 (p<0.001) was the most significant (Fig 3b), while among GO terms for cellular components,  
170 “respirasome” (p<0.001) and “respiratory chain” (p<0.001) were the most significantly  
171 enriched (S1a Fig). To visualize ETC gene expression compared to the general expression  
172 distribution of all genes in the RNA sequencing datasets, we plotted candidates of the  
173 “oxidative phosphorylation” pathway with a p-value of <0.05 for control Sertoli cells (Fig 3c).  
174 All ETC components are more highly expressed than the average gene in Sertoli cells. Genes  
175 encoded by mitochondrial DNA (*ND2*, *ND4*, *ND6*, *CYTB*, *COX1*, *COX2*) have higher, but more  
176 variable expression than genes encoded by nuclear DNA (Fig 3c). This is consistent with  
177 recent single-cell RNA sequencing datasets in mouse testis (Green et al. 2018). In Sertoli cells  
178 from MSUS males, ETC genes encoded by nuclear DNA were primarily downregulated

179 compared to controls (Fig 3d), while changes in mitochondrial genes were more variable (S2a  
180 Fig). Validation of changes in ETC genes in a second batch of Sertoli cells by multiplex RT-  
181 qPCR screen (Fluidigm) confirmed that the majority of ETC genes were downregulated in  
182 MSUS Sertoli cells (Fig 3e). Out of 18 target genes identified from the KEGG pathway  
183 “oxidative phosphorylation”, 4 were downregulated significantly ( $p < 0.05$ ; *ND4*, *ND6*, *CYTB*,  
184 *Uqcrl1*), while no genes were significantly upregulated. When looking closer at downregulated  
185 genes, particularly components of ETC complex I, III, and IV were downregulated, while  
186 components of complex II and V had variable expression changes. Also, mitochondrial genes  
187 were predominantly downregulated, which was different to what we expected from the RNA  
188 sequencing data of batch 1, which showed higher inconsistency in mitochondrial gene  
189 expression changes (S2a Fig). However, this bias might be attributable to significant  
190 mitochondrial copy number variation (CNV) in MSUS vs. control Sertoli cell samples of batch  
191 1 (S2b Fig).

192

193

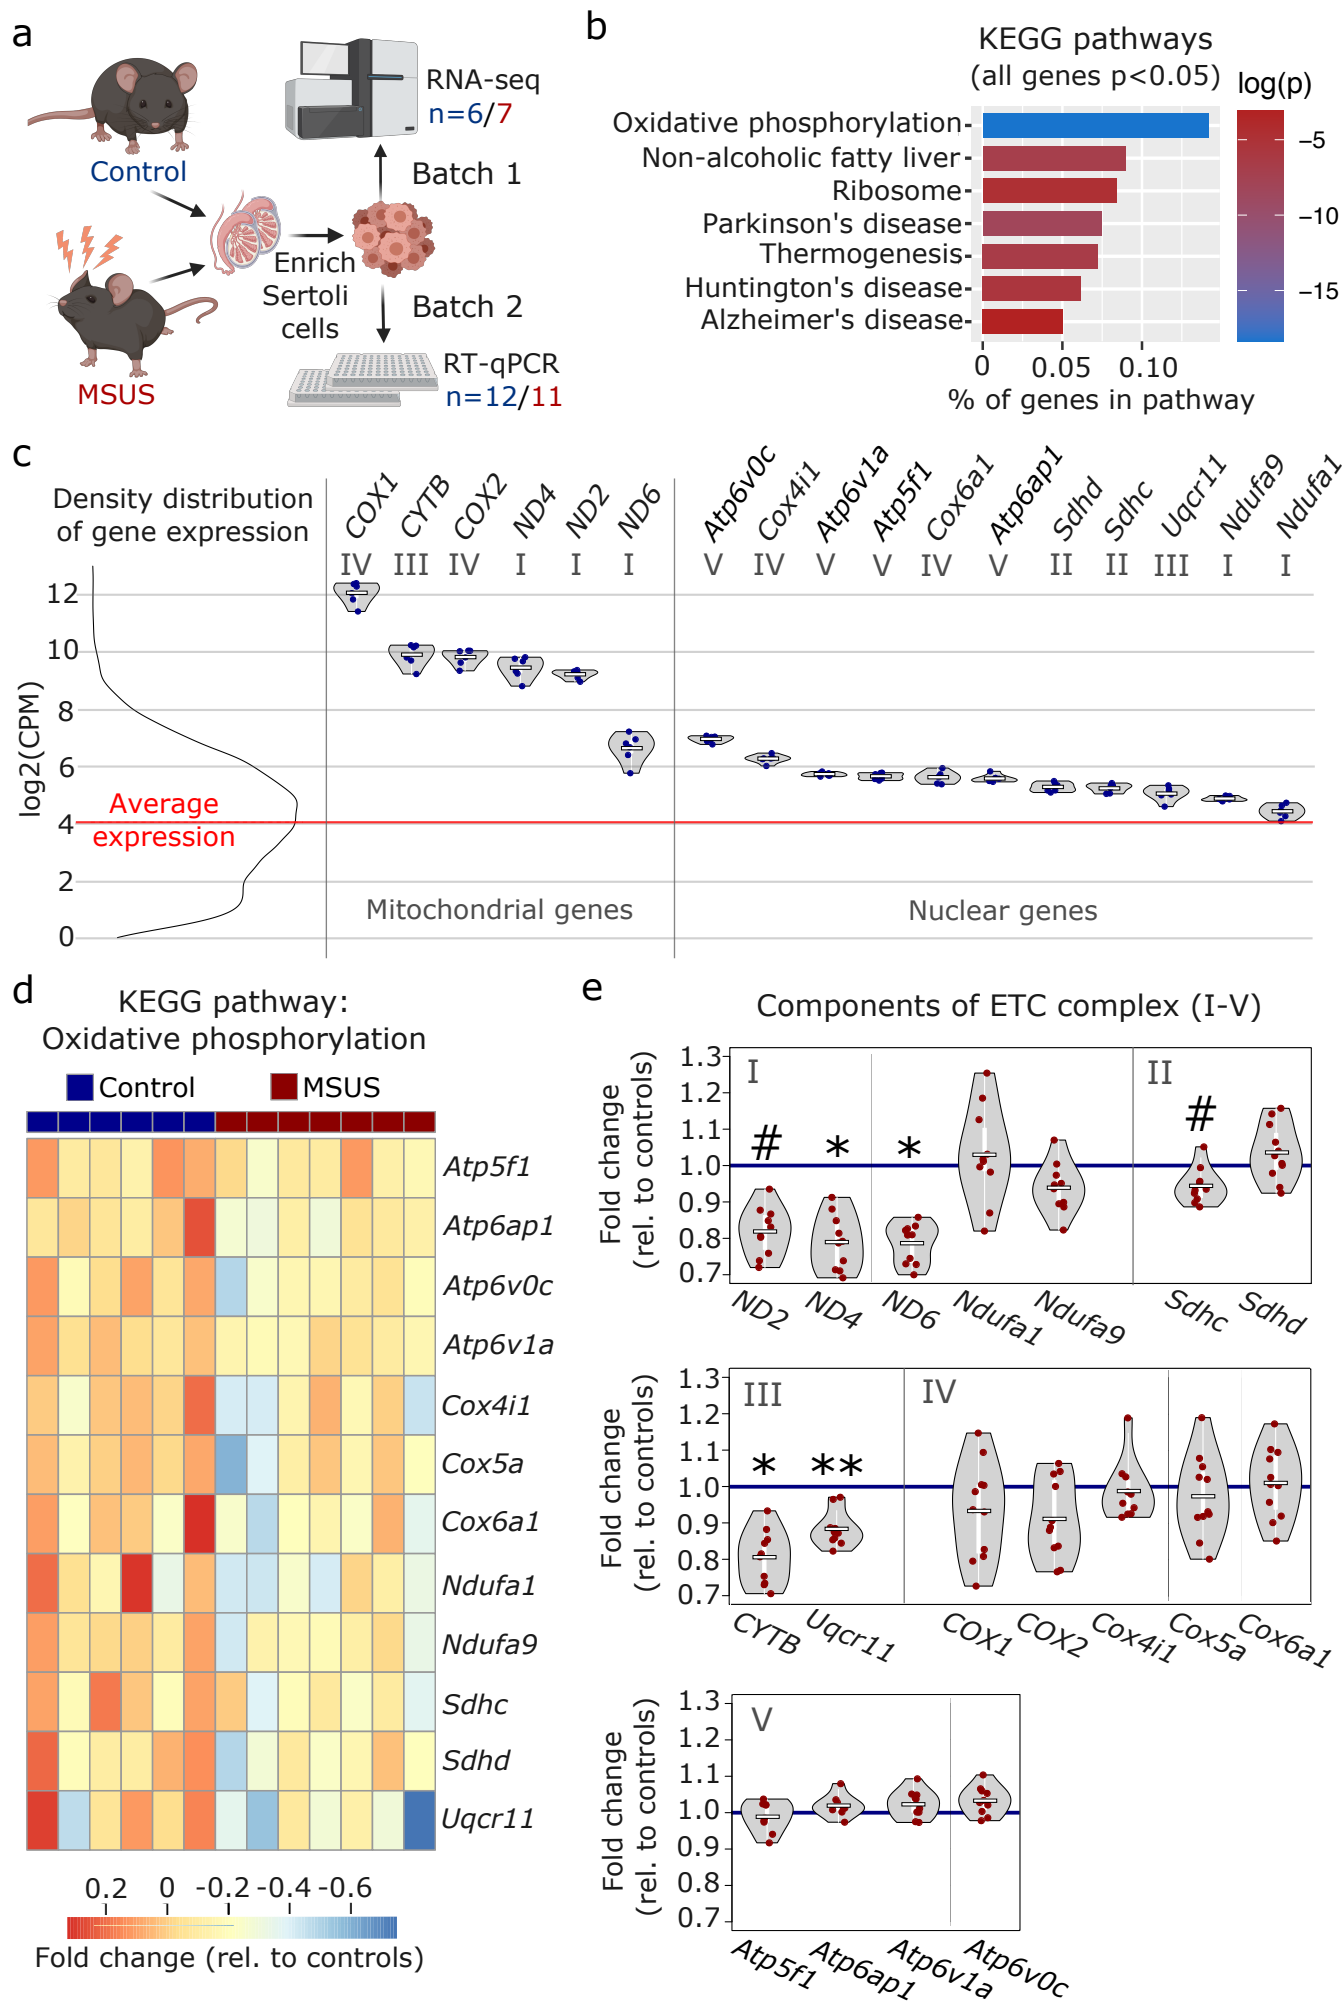



194 **Fig 3. Transcriptomic analyses of MSUS and control adult Sertoli cells.** (a) Schematic  
195 representation of the experimental strategy for Sertoli cells enrichment and transcriptomic  
196 analyses for control (blue) and MSUS (red) mice. For RNA sequencing, n=6 controls and n=7  
197 MSUS (Batch 1). For validation of candidate genes with RT-qPCR, n=12 controls and n=11  
198 MSUS (Batch 2). (b) KEGG pathways of significantly altered genes ( $p < 0.05$ ) in Sertoli cells  
199 from MSUS males with % genes per pathway (x axis) and log of p-value ( $\log(p)$ ) on vertical  
200 color scale. (c) Expression profile of ETC candidate genes from KEGG pathway “oxidative  
201 phosphorylation” in control samples (scale is in  $\log_2(\text{CPM})$ ). Left, density distribution of all  
202 expressed genes, with red line indicating the average expression of genes in control Sertoli  
203 cells. Right, candidate genes encoded by mitochondrial (Mitochondrial genes) and nuclear  
204 (Nuclear genes) DNA plotted on the same scale. Roman numbers indicate name of ETC  
205 complex. Mean of control samples depicted as white line, individual samples as blue dots. (d)  
206 Heatmap of nuclear encoded genes with  $p < 0.05$  of KEGG pathway “oxidative  
207 phosphorylation”. Fold change relative to controls is indicated in the color scale. (e) RT-qPCR  
208 of ETC candidate genes in batch 2 samples. Candidate genes are divided according to ETC  
209 complexes (I, II, III, IV, V) and fold change of expression profiles is shown for MSUS samples  
210 relative to control mean (blue line) of respective genes. Mean of MSUS samples depicted as  
211 white line, individual samples as red dots. \*\* $p < 0.01$ , \* $p < 0.05$ , # $p < 0.1$ , student’s t-test.

212

## 213 **Serum from MSUS males downregulates ETC components** 214 **in primary Sertoli cells**

215 Our previous work showed that serum from MSUS males can induce molecular changes in  
216 reproductive cells, when injected intravenously to adult males or when used to treat  
217 immortalized spermatogonial stem cells (van Steenwyk et al. 2020). Since Sertoli cells receive  
218 signals from the blood stream, we examined if serum from MSUS males can reproduce  
219 changes in ETC components observed after MSUS. We prepared primary Sertoli cell cultures  
220 from mouse testis and supplemented them with 10% serum obtained from MSUS or control  
221 mice for 24 hours (Fig 4a). Analyses of candidate genes by RT-qPCR showed that 4 ETC  
222 components are significantly downregulated ( $p < 0.05$ ; *ND6*, *Ndufa1*, *COX1*, *Cox6a*) (Fig 4b).  
223 Downregulation was most consistent for components of complex I, III, and IV while complex  
224 II and V components were more variably altered, and some of them upregulated ( $p < 0.05$ ;  
225 *Sdhc*, *Atp6ap1*).

226

227

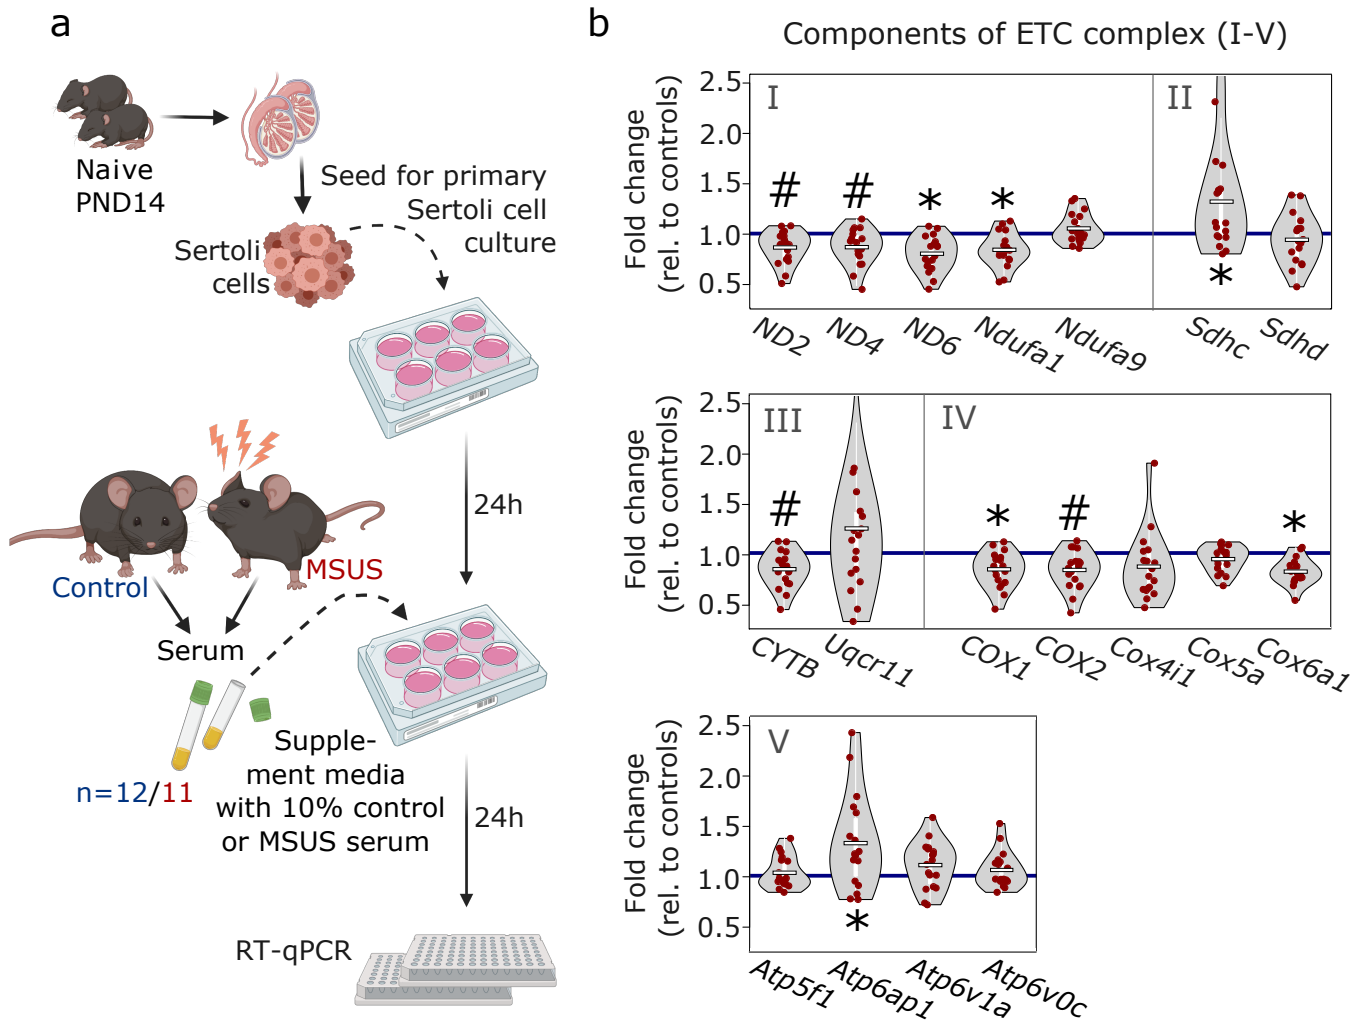

228 **Fig 4. Analyses of ETC genes in primary Sertoli cells after MSUS serum exposure.** (a)  
229 Schematic representation of the experimental strategy for serum treatment of Sertoli cells.  
230 Primary Sertoli cells from naïve mouse pups (PND14) were seeded and treated with 10%  
231 serum from control (blue) and MSUS (red) mice for 24h. Treated cells were then harvested  
232 for RT-qPCR. Controls, n=12; MSUS, n=11. Experiment was performed in duplicates. (b) RT-  
233 qPCR of ETC candidate genes in serum treated Sertoli cells. Candidate genes are divided  
234 according to ETC complexes (I, II, III, IV, V) and fold change of expression profiles is shown  
235 for MSUS samples relative to control mean (blue line) of respective genes. Mean of MSUS  
236 samples depicted as white line, individual samples as red dots. \*p<0.05, #p<0.1, Kenward  
237 Roger method.

238

## 239 **Exposure to MSUS serum does not alter metabolic** 240 **functions of primary Sertoli cells**

241 Differential regulation of the ETC can affect the intracellular redox state of cells and alter their  
242 lactate-pyruvate ratio (Titov et al. 2016; Patgiri et al. 2020). Therefore, we examined if the  
243 downregulation of ETC complex I, III, and IV components has metabolic consequences for  
244 Sertoli cells. We measured lactate and pyruvate in the conditioned medium of primary Sertoli  
245 cells after MSUS serum treatment and examined ROS activity by 2',7'-dichlorofluorescein  
246 diacetate (DCFDA) staining. The level of lactate and pyruvate was not significantly altered  
247 (S3a,b Fig). Likewise, the ratio of lactate to pyruvate (S3c Fig) or ROS levels (S3d Fig) were  
248 not altered. These results suggest that the downregulation of ETC complexes I, III, and IV  
249 after MSUS serum exposure was not sufficient to affect metabolic functions of Sertoli cells.

250

## 251 **Discussion**

252 This study examines the effects of early life stress on somatic cells in the adult mouse testis  
253 and addresses the question of which factors may play a role in the induction of these effects.  
254 Using an established mouse model of stress, we show that Sertoli cells from adult males  
255 exposed to stress in early postnatal life have altered ETC pathways. The alterations affect  
256 several mitochondrial complex components, which are predominantly downregulated in adult  
257 Sertoli cells. We link these alterations to circulating blood factors by showing that the ETC  
258 complexes downregulation can be reproduced in primary Sertoli cells in culture when the cells  
259 are treated with serum from exposed adult males. These results suggest that Sertoli cells can  
260 be persistently altered by adverse conditions in early life and keep a biological trace of  
261 exposure for many months. This may be explained by the fact that these cells are post-mitotic  
262 in the adult testis and are no longer able to self-renew unlike spermatogenic cells. They  
263 therefore do not have the possibility to correct or erase molecular changes by cell division and

264 renewal, and remain altered until adulthood, possibly throughout life. Other environmental  
265 factors such as endocrine disruptors have also been found to affect Sertoli cells in rats  
266 (Guerrero-Bosagna et al. 2013).

267 Since Sertoli cells are essential for germ cell maintenance and physiology, their persistent  
268 alterations during development through to adulthood may affect spermatogenesis and have  
269 detrimental consequences for germ cells and fertility. Psychological stress has indeed been  
270 reported to reduce fertility in humans (Bräuner et al. 2020) and is known to lead to molecular  
271 changes in spermatogenic cells in testis (Tian et al. 2021) and adult sperm in rodents (Gapp  
272 et al. 2014; Franklin et al. 2010), with the potential to impair metabolism and behavior in the  
273 offspring (Gapp et al. 2014). However, the mechanisms by which Sertoli cells may alter germ  
274 cells are not known.

275 Our data that ETC components in Sertoli cells are affected, suggest a link between stress  
276 exposure at a young age and mitochondrial functions in the adult. Mitochondria are organelles  
277 known for their ability to adjust to changes in metabolic demand in cells (Bereiter-Hahn and  
278 Vöth 1994). Thus, they are sensitive targets of systemic cellular perturbations and potential  
279 sensors of environmental exposure. Indeed, ETC components in brain and muscle have  
280 already been shown to be altered by early postnatal stress in mice (Ruigrok et al. 2021). Our  
281 data extend these findings by showing that ETC complexes are also affected persistently in  
282 Sertoli cells by early postnatal stress, and provide candidate molecular targets to examine in  
283 relation to potential germ cell damage. The downregulated complexes I, III, and IV have in  
284 common to be able to transport protons across the inner mitochondrial membrane, and  
285 contribute to the generation of a proton gradient for ATP production (Marreiros et al. 2016).  
286 This could influence the metabolism of not only Sertoli cells, but also of neighboring germ cells  
287 via altered extracellular signaling pathways such as redox state and lactate production (Titov  
288 et al. 2016; Patgiri et al. 2020). However, in cultured Sertoli cells, reproducing ETC pathways  
289 alterations with serum from stressed males did not affect reactive oxygen species (ROS),  
290 lactate or pyruvate level. This suggests that changes may only be subtle and cannot be

291 detected by classical methods such as fluorescent assays *in vitro*, or may be compensated  
292 for by alternative mechanisms. Using sensitive substrate sensors such as genetically encoded  
293 fluorescence resonance energy transfer (FRET) sensors to detect metabolite flows *in vitro* or  
294 *in vivo* may help identify changes (Mächler et al. 2016). Other systemic effects by cell-cell-  
295 communication within testis or signaling through innervation and via the lymphatic system may  
296 also occur.

297 Classically, methods to enrich Sertoli cells are based on specific culture procedures and  
298 conditions which have some limitations. For instance, *Datura stramonium* (DSA)-lectin coated  
299 dishes can be used to favor the attachment of Sertoli cells (Scarpino et al. 1998) and allow  
300 easier removal of contaminating germ cells by washing and/or hypotonic shock (Wagle et al.  
301 1986; Anway et al. 2003). However, culture conditions can introduce biases to cells and modify  
302 their epigenetic landscape and functions compared to *in vivo* (Zomer and Reddi 2020a).  
303 Therefore, enrichment methods not requiring any culture, but allowing to isolate cells directly  
304 from tissue, are advantageous for molecular analyses. For Sertoli cells, transgenic or knock-  
305 in mice expressing fluorescent proteins under the control of *Amh* or *Sox9* promoters have  
306 been generated and can yield relatively pure Sertoli cell preparations by FACS (Zimmermann  
307 et al. 2015; Zomer and Reddi 2020b). However, wildtype mice may be preferable to avoid  
308 possible transgene interference (in homozygous mice for instance) or GFP protein toxicity,  
309 and for easier availability without requiring any specific breeding scheme. This is particularly  
310 needed for large-scale *in vivo* experiments that require big cohorts for phenotyping like  
311 behavioral, physiological and/or metabolic testing. Our FACS-based method provides an  
312 efficient alternative through capitalizing on previous work in fixed cells (Rotgers et al. 2015),  
313 using parameters that separate testicular populations by ploidy through DNA staining and light  
314 scattering via cytometry. Due to intracellular stainings with Hoechst and MitoTracker, biases  
315 due to cleavage or internalization of surface antigens after enzymatic digestion can be avoided  
316 (Autengruber et al. 2012; Tsuji et al. 2017). Using this method, we obtain a high enrichment  
317 of Sertoli cells confirmed by vimentin staining (Fig 1 f-i) and specific markers expression in

318 obtained cells (Fig 2a). Notably, markers of elongated spermatids such as *Prm2* were detected  
319 in our Sertoli cells datasets, similarly to previously reported in testis single-cell sequencing  
320 datasets (Green et al. 2018). These marker transcripts likely correspond to remnants of  
321 spermatids phagocytosed by Sertoli cells that persist in their cytoplasm. Lastly, we cannot  
322 exclude that Hoechst and MitoTracker binding affects DNA and mitochondria integrity in sorted  
323 Sertoli cells. However, incubation with the stains is kept to a minimum and cells are placed on  
324 ice at all times after staining.

325 In conclusion, our findings highlight the vulnerability of Sertoli cells during postnatal  
326 development and the fact that they can be persistently altered by stress exposure. Whether  
327 and how this may ultimately affect germ cells functions and physiology is still an open question  
328 that needs to be investigated.

329

## 330 **Methods**

### 331 **Animals**

332 Adult C57Bl/6J mice (3-5 months old) were kept under a 12-h reverse light/dark cycle in a  
333 temperature- and humidity-controlled facility with access to food and water ad libitum. All  
334 experiments were performed during the active (dark) cycle of the mice in accordance with  
335 guidelines and regulations of the Cantonal Veterinary Office, Zürich (animal  
336 licenses ZH057/15 and ZH083/18).

### 337 **MSUS paradigm**

338 3-month old female and male breeders were randomly paired and assigned to MSUS or  
339 control groups. Newborn pups in the MSUS group were separated from their mother for 3 h  
340 per day at unpredictable times from postnatal day (PND) 1 to 14. Any time during separation,  
341 mothers underwent an unpredictable acute swim in cold water (18°C for 5 min) or 20-min  
342 restraint in a tube. Control animals were left undisturbed. Pups were weaned at PND21 and



343 assigned to new cages according to group and gender (3–5 mice/cage). Siblings were  
344 assigned to different cages to avoid litter effects. An overview of MSUS and control mice used  
345 for tissue collection is presented in S3 Table.

## 346 **Testis collection**

347 Adult mice were single-housed with food and water *ad libitum* the night before sacrifice to  
348 minimize stress. Mice were sedated with isoflurane before decapitation. For testis collection  
349 in pups at PND14, whole litters (4–6 males on average) were sacrificed by decapitation soon  
350 after being removed from their mother.

## 351 **Enzymatic digestion of mouse testis**

352 Testes were dissected, decapsulated and placed into a 50 ml canonic tube containing 10 ml  
353 of enriched DMEM/F12 medium (1x DMEM/F12 [Gibco], supplemented with 15mM HEPES,  
354 1x GlutaMAX [Gibco], 1x Minimum Essential Medium Non-essential Amino Acids [Gibco] and  
355 1% penicillin-streptomycin [Pen-Strep; Gibco, 10,000 U/ml]). The tissue was transferred to 5  
356 ml collagenase solution (1mg/ml collagenase [from *Clostridium histolyticum*, Sigma Aldrich]  
357 and 0.02 mg/ml DNase [from bovine pancreas, Sigma Aldrich] in enriched DMEM/F12) and  
358 incubated at 35°C for 5-10 minutes with intermittent shaking until seminiferous tubules  
359 dissociated from the interstitium. For washing, 25 ml of enriched DMEM/F12 were added, the  
360 tube was inverted three times and tubules were allowed to settle for 2-3 minutes. Supernatant  
361 containing interstitial cells was discarded and the washing step was repeated twice. Then, 5  
362 ml 0.25% trypsin-EDTA solution (Gibco) supplemented with 0.1 mg/ml DNase were added to  
363 the tubules and incubated at 35°C for 5-10 minutes with intermittent shaking until tubules were  
364 fragmented. Tubules were washed one time with enriched DMEM/F12 containing 10% fetal  
365 bovine serum (FBS; HyClone, Cat. No. SV30160.03) to inactivate trypsin and were allowed to  
366 settle for 5 minutes. Supernatant containing peritubular cells was removed and washing was  
367 repeated with enriched DMEM/F12 two more times. To obtain a single-cell suspension from  
368 the cleaned seminiferous tubules, the tissue was further digested in hyaluronidase solution

369 (1mg/ml hyaluronidase [from sheep testes, Sigma Aldrich] and 0.02 mg/ml DNase in enriched  
370 DMEM/F12) for 5-10 more minutes at 35°C with intermittent shaking. For proper dissociation  
371 of cells, they were passed through a 5 ml serological pipette 4-5 times, then 25 ml enriched  
372 DMEM/F12 were added. Cells were centrifuged at 400xg for 3 minutes, the supernatant was  
373 removed and cells were resuspended in 10 ml enriched DMEM/F12. To remove any remaining  
374 cell clumps, the cell suspension was slowly passed through a 20G needle, then filtered through  
375 a 70 µm cell strainer. 25 ml of enriched DMEM/F12 were added and cells were centrifuged at  
376 400xg for 3 minutes and collected for further enrichment.

## 377 **Blood processing**

378 To obtain serum, trunk blood was collected and allowed to clot for 15-30 minutes at room  
379 temperature (RT). To separate serum from the clot, samples were centrifuged for 10 minutes  
380 at 2,000 x g. The supernatant (serum) was transferred to a new tube and stored at -80°C until  
381 further use.

## 382 **Fluorescence-activated cell sorting (FACS)**

383 Cells obtained after enzymatic digestion of testis were resuspended in 5-10 ml FACS buffer  
384 (1x DPBS [Gibco] supplemented with 1% Pen-Strep, 1% FBS, 10 mM HEPES, 1 mM pyruvate  
385 [Gibco] and 1 mg/ml glucose [Gibco]) and counted with a hemocytometer. Cells were diluted  
386 at  $10^6/100$  µl in FACS buffer. 1 µl of Hoechst 33342 Solution (BDPharmingen, stock: 1 mg/ml)  
387 and 0.1 µl of MitoTracker Deep Red (Invitrogen, stock: 1mM) were added per 100 µl cell  
388 suspension, then cells were incubated at 35°C for 20 minutes. Thereafter, cells were kept on  
389 ice at all times. Cells were washed twice with ice-cold FACS buffer and the Sertoli cell fraction  
390 was sorted according to the FACS diagram depicted in Fig 1b-e. Briefly, cell debris and  
391 doublets were gated out and remaining cells were gated for diploidy using the Hoechst  
392 channel. Diploid cells were further gated for high FSC and subsequently for a high signal in  
393 the MitoTracker channel.

## 394 **Immunocytochemistry**

395 Round coverslips (diameter: 8mm, thickness: 1, Warner Instruments) were placed into 48-well  
396 plates and coated with Poly-L-lysine solution (P8920, Sigma-Aldrich) for at least 15 min at RT.  
397 Coverslips were then washed three times with distilled, autoclaved water and were allowed to  
398 dry overnight. The day after, always 40,000 cells in enriched DMEM/F12 medium  
399 supplemented with 10% FBS were plated onto the slides and allowed to attach at RT for at  
400 least 20 min and another hour in an incubator at 37°C. Thereafter, medium was aspirated and  
401 cells were fixed with 4% paraformaldehyde (PFA) for 15 min at RT. Cells were washed with  
402 PBS three times and then incubated in blocking solution (PBS supplemented with 0.1% Triton-  
403 X-100 [X100, Sigma-Aldrich] and 10% normal donkey serum [017-000-121, Jackson  
404 ImmunoResearch]) for at least one hour at RT. After blocking, cells were stained with rabbit-  
405 anti-Vimentin antibody (EPR3776, Abcam) diluted 1:1000 in blocking solution overnight at  
406 4°C. After washing three times with PBS, a donkey-anti-rabbit Alexa Fluor 488 antibody  
407 (AB\_2313584, Jackson ImmunoResearch) was added in a dilution of 1:500 in blocking  
408 solution. Wells were washed again with PBS and incubated in DAPI stain (1:10,000) for 10  
409 min. Coverslips were washed again in PBS and mounted onto slides with Eukitt quick-  
410 hardening mounting medium (03989, Sigma-aldrich). Slides were dried overnight before  
411 picture caption using an Olympus CKX53 and cellSens software (Olympus). Percentage of  
412 vimentin-positive cells was determined using Fiji cell counter plugin (Schindelin et al. 2012).

## 413 **Primary Sertoli cell culture**

414 24-well plates were coated with a DSA-lectin (L2766, Sigma Aldrich) solution (5 µg/ml in 1x  
415 Hank's balanced salt solution [HBSS, Gibco]) for at least 1 hour at 37°C. Plates were washed  
416 twice with 1xHBSS before use. PND14 testes were enzymatically digested and resuspended  
417 in medium (DMEM high glucose [Sigma] supplemented with 0.1% bovine serum albumin  
418 [BSA, Sigma], 1x GlutaMAX [Gibco], 1x Minimum Essential Medium Non-essential Amino  
419 Acids [Gibco] and 1% Pen-Strep) at 800,000 cells/ml. 500 µl of cell suspension were added

420 to DSA-lectin coated 24-wells and cells were allowed to attach for 2 hours at 32°C. Cells were  
421 incubated with a hypotonic solution (0.3xHBSS) for 1-2 minutes at RT to remove germ cells,  
422 washed with 1xHBSS to eliminate debris and new medium was added. Cells were left  
423 undisturbed for 24 hours before treatment.

## 424 **Serum treatment of primary Sertoli cell cultures**

425 Cell culture medium was supplemented with 10% serum from MSUS and control adult males  
426 (batch 1), sterile-filtered using 0.22 µm PVDF filter units (Merck) and distributed to each well  
427 by individual male (1 well/mouse). After 24 hours, medium was removed and used for  
428 lactate/pyruvate assessment or snap-frozen and stored at -80°C. Cells were washed once  
429 with 1xPBS and harvested in 500 µl TRIzol (Thermo Fisher Scientific) for RNA extraction. This  
430 experiment was conducted twice in independent replicates.

## 431 **Lactate/pyruvate assessment**

432 Conditioned medium was centrifuged at 3,200xg for 10 min at 4°C to remove debris and  
433 transferred to 10 kDa spin columns (Amicon Ultra, Merck). Proteins that may influence lactate  
434 and pyruvate level were removed from the <10 kDa flow-through containing metabolites by  
435 centrifugation at 14,000xg for 25 min at 4°C. Lactate and pyruvate were measured in the  
436 protein-depleted flow-through using assay kits (MAK064-1KT, Sigma-Aldrich) and (ab65342,  
437 Abcam) according to the manufacturer's instructions. Each sample was run twice and  
438 fluorescence was measured on a NOVOSTar Microplate reader (BMG Labtech) and averaged.  
439 For each sample, lactate/pyruvate ratio was calculated using the average lactate and pyruvate  
440 measurements of the replicates.

## 441 **ROS assessment**

442 ROS production was measured in serum-treated primary Sertoli cultures using  
443 DCFDA/H<sub>2</sub>DCFDA-Cellular ROS Assay Kit (ab113851, Abcam) according to the  
444 manufacturer's instructions. Fluorescence was measured immediately, then after 10, 30, and

445 60 minutes on a NOVOSTar Microplate reader (BMG Labtech). The experiment was run in  
446 triplicates, which were averaged for each time point.

## 447 **RNA and DNA extraction**

448 For sorted Sertoli cells obtained from adult males, RNA and DNA were extracted using the  
449 AllPrep DNA/RNA/miRNA Universal Kit (Qiagen) according to the manufacturer's instructions.  
450 For cultured cells harvested in TRIzol (Thermo Fisher Scientific), a phenol/chloroform  
451 extraction method was used to prepare RNA.

## 452 **RNA sequencing**

453 RNA samples were run on a Bioanalyzer (Agilent) at a concentration of 1.5 ng/μl using the  
454 eukaryote total RNA pico series II assay (Agilent) to assess RNA integrity. Libraries for RNA  
455 sequencing were prepared from 5 ng RNA/sample using the SMARTer Stranded Total RNA-  
456 Seq Kit v2 - Pico Input Mammalian (Takara) according to the manufacturer's instructions using  
457 12 PCR cycles for amplification. DNA concentration of libraries was determined using Qubit  
458 dsDNA HS Assay Kit, and libraries were diluted to 1.5 ng/μl, then run on a Bioanalyzer  
459 (Agilent) using the High Sensitivity DNA Assay Protocol (Agilent) for quality control. Libraries  
460 were sequenced on an Illumina NovaSeq instrument, single-end at 100 bp.

## 461 **Analyses of RNA sequencing data**

462 Fastq files were checked for quality using FastQC (v 0.11.9) (Andrews 2010) trimmed with  
463 Trimalore (v 0.6.5) (Krueger 2012) and pseudo-mapped with Salmon (v 1.1.0) (Patro et al.  
464 2017) using an index file created from the GENCODE annotation of transcripts (vM23)  
465 (Frankish et al. 2019). For differential gene expression analysis, counts were normalized using  
466 the TMM method (Robinson and Oshlack 2010) and transformed with the voom method of the  
467 limma R-Package (v 3.42.2) (Ritchie et al. 2015) for linear modelling. All genes with  $p < 0.05$   
468 were used for functional enrichment analyses using the g:GOST function of g:Profiler

469 (Raudvere et al. 2019), taking into account GO terms and KEGG pathways with 10-1000  
470 annotated genes. GO terms were further simplified using Revigo (Supek et al. 2011).

## 471 **Fluidigm RT-qPCR**

472 RNA was reverse-transcribed with miScript II RT reagents (Qiagen) using HiFlex buffer  
473 according to the manufacturer's instructions. For high-throughput gene expression analyses,  
474 samples and primers (list of primers: S4 Table) were prepared for the Fluidigm BioMark™ HD  
475 System (Fluidigm) according to the manufacturer's protocol. Pre-amplified cDNA samples and  
476 primers were loaded onto a 96.96 dynamic array™ (primers were loaded in duplicates) and  
477 mixed using an IFC (integrated fluidic circuits) machine (Fluidigm). Ready chips were then  
478 placed into a Fluidigm Biomark™ HD System for RT-qPCR analyses.

## 479 **Analyses of Fluidigm RT-qPCR data**

480 Baseline correction (using linear derivative) and assessment of cycle threshold (Ct) values  
481 were performed by the BioMark HD software (Fluidigm). A list of Ct values was obtained from  
482 the BioMark output tables and ordered according to sample batch. ReadqPCR (v 1.32.0) and  
483 NormqPCR (v 1.32.0) were used for downstream data preparation, including combination of  
484 technical replicates, normalizing to the 2 most stable reference genes out of 5 (Actb, B2m,  
485 Hrpt1, Rplp0 or Vim), and deriving delta C<sub>q</sub> values. Samples were normalized to the mean of  
486 control samples and log<sub>2</sub> foldchanges were calculated.

## 487 **Determination of mitochondrial copy number variation** 488 **(CNV)**

489 DNA samples were analyzed by RT-qPCR using QuantiTect SYBR (Qiagen) on a Light Cycler  
490 II 480 (Roche): 95°C for 15 min, 45 cycles of 15 sec at 94°C, 30 sec at 55°C and 30 sec at  
491 70°C. HK2 primers amplifying nuclear DNA were used as endogenous control and ND1

492 primers to amplify mitochondrial DNA (Primers list in S4 Table). Fold change of ND1 versus  
493 HK2 amplification was calculated with  $2^{(-\Delta\Delta CT)}$  method and normalized to controls.

## 494 **Statistics**

495 Student's t-test was used to assess significance between two groups. Kenward-Roger method  
496 using R packages lmerTest (v 3.1-3) and lme4 (v 1.1-27.1) was used to assess significance  
497 for experiments run in duplicates. Outliers at a distance greater than 2.5 standard deviations  
498 from 0 were removed before analyses.

499

## 500 **Data availability**

501 The RNA-sequencing datasets collected in this study are available in the Gene Expression  
502 Omnibus GSE205330.

503

## 504 **Acknowledgements**

505 We thank Chiara Boscardin, Anastasia Efimova, Lola Kourouma, and Anar Alshanbayeva for  
506 assisting with the mouse work including breeding and MSUS paradigm, Andrew McDonald,  
507 Silvia Schelbert, and Alberto Corcoba for animal license and laboratory organization in Zürich,  
508 and Yvonne Zipfel and Jerome Bürki for animal care in Zürich. We are grateful for the valuable  
509 input from Pierre-Luc Germain and Deepak Kumar Tanwar for bioinformatic analyses, from  
510 Ali Jawaid for general input on study and experimental design, and Maria Dimitriu, Nancy  
511 Carullo, and Rodrigo Arzate-Mejia for proof reading. We are thankful to Niharika Obrist for  
512 technical assistance and Tao Lei and Jörg Klug from the Institute of Anatomy and Cell Biology  
513 at the University of Giessen, Germany for help with the protocol for Sertoli cell cultures. We  
514 thank the team of the cytometry facility at the University of Zurich for all FACS related issues,  
515 Aria Minder and Silvia Kobel of the Genomic Diversity Center for assistance with the fluidigm

516 qPCR, and the team of the Functional Genomics Center Zurich for assistance with RNA  
517 sequencing. This work was funded by the University of Zurich, the ETH Zurich, the National  
518 Centre of Competence in Research (NCCR) RNA & Disease funded by the Swiss National  
519 Science Foundation (grant number 182880/Phase 2 and 205601/Phase 3), ETH grants (ETH-  
520 10 15-2 and ETH-17 13-2), and the Escher Family Fund. Illustrations in figures 1a, 3a, and 4a  
521 as well as the graphical abstract were created with BioRender.com.

522

## 523 **Author contributions**

524 KMT and IMM conceived and designed the study, and wrote the manuscript. FM conducted  
525 MSUS treatment and prepared animals with the help of KMT. KMT collected and prepared  
526 Sertoli cells and serum for transcriptomic analyses and serum treatments of cell cultures. KMT  
527 prepared RNA libraries for RNA sequencing. KMT and SL prepared primary Sertoli cell  
528 cultures, and carried out serum treatment and molecular analyses. KMT analyzed the data  
529 and prepared the Figs. IMM provided conceptual support throughout the project, and raised  
530 funds to finance the project.

531

## 532 **Conflict of interest**

533 The authors declare no conflict of interest.

534

## 535 **References**

536 Andrews, S. 2010. "FastQC: A Quality Control Tool for High Throughput Sequence Data."

537 Available at: [Http://Www.Bioinformatics.Babraham.Ac.Uk/Projects/Fastqc](http://www.Bioinformatics.Babraham.Ac.Uk/Projects/Fastqc). 2010.

538 Anway, Matthew D., Janet Folmer, William W Wright, and Barry R Zirkin. 2003. "Isolation of

539 Sertoli Cells from Adult Rat Testes: An Approach to Ex Vivo Studies of Sertoli Cell



- 540 Function.” *Biology of Reproduction* 68 (3): 996–1002.  
541 <https://doi.org/10.1095/biolreprod.102.008045>.
- 542 Autengruber, A, M Gereke, G Hansen, C Hennig, and D Bruder. 2012. “Impact of Enzymatic  
543 Tissue Disintegration on the Level of Surface Molecule Expression and Immune Cell  
544 Function.” *European Journal of Microbiology & Immunology* 2 (2): 112–20.  
545 <https://doi.org/10.1556/EuJMI.2.2012.2.3>.
- 546 Bereiter-Hahn, J, and M Vöth. 1994. “Dynamics of Mitochondria in Living Cells: Shape  
547 Changes, Dislocations, Fusion, and Fission of Mitochondria.” *Microscopy Research  
548 and Technique* 27 (3): 198–219. <https://doi.org/10.1002/jemt.1070270303>.
- 549 Bhushan, Sudhanshu, Ferial Aslani, Zhengguo Zhang, Tim Sebastian, Hans-Peter Elsasser,  
550 and Jorg Klug. 2016. “Isolation of Sertoli Cells and Peritubular Cells from Rat Testes.”  
551 *Journal of Visualized Experiments : JoVE*, no. 108 (February): e53389.  
552 <https://doi.org/10.3791/53389>.
- 553 Bräuner, Elvira V, Loa Nordkap, Lærke Priskorn, Åse Marie Hansen, Anne Kirstine Bang,  
554 Stine A Holmboe, Lone Schmidt, Tina K Jensen, and Niels Jørgensen. 2020.  
555 “Psychological Stress, Stressful Life Events, Male Factor Infertility, and Testicular  
556 Function: A Cross-Sectional Study.” *Fertility and Sterility* 113 (4): 865–75.  
557 <https://doi.org/10.1016/j.fertnstert.2019.12.013>.
- 558 Clutton, Genevieve, Katie Mollan, Michael Hudgens, and Nilu Goonetilleke. 2019. “A  
559 Reproducible, Objective Method Using MitoTracker(R) Fluorescent Dyes to Assess  
560 Mitochondrial Mass in T Cells by Flow Cytometry.” *Cytometry. Part A : The Journal of  
561 the International Society for Analytical Cytology* 95 (4): 450–56.  
562 <https://doi.org/10.1002/cyto.a.23705>.
- 563 Frankish, Adam, Mark Diekhans, Anne-Maud Ferreira, Rory Johnson, Irwin Jungreis, Jane  
564 Loveland, Jonathan M Mudge, et al. 2019. “GENCODE Reference Annotation for the  
565 Human and Mouse Genomes.” *Nucleic Acids Research* 47 (D1): D766–73.

- 566 <https://doi.org/10.1093/nar/gky955>.
- 567 Franklin, Tamara B, Holger Russig, Isabelle C Weiss, Johannes Graff, Natacha Linder,  
568 Aubin Michalon, Sandor Vizi, and Isabelle M Mansuy. 2010. "Epigenetic Transmission  
569 of the Impact of Early Stress across Generations." *Biological Psychiatry* 68 (5): 408–15.
- 570 Gapp, Katharina, Ali Jawaid, Peter Sarkies, Johannes Bohacek, Pawel Pelczar, Julien  
571 Prados, Laurent Farinelli, Eric Miska, and Isabelle M. Mansuy. 2014. "Implication of  
572 Sperm RNAs in Transgenerational Inheritance of the Effects of Early Trauma in Mice."  
573 *Nature Neuroscience* 17: 667–669.
- 574 Gaysinskaya, Valeriya, Ina Y Soh, Godfried W van der Heijden, and Alex Bortvin. 2014.  
575 "Optimized Flow Cytometry Isolation of Murine Spermatocytes." *Cytometry. Part A : The*  
576 *Journal of the International Society for Analytical Cytology* 85 (6): 556–65.  
577 <https://doi.org/10.1002/cyto.a.22463>.
- 578 Green, Christopher Daniel, Qianyi Ma, Gabriel L Manske, Adrienne Niederriter Shami,  
579 Xianing Zheng, Simone Marini, Lindsay Moritz, et al. 2018. "A Comprehensive  
580 Roadmap of Murine Spermatogenesis Defined by Single-Cell RNA-Seq."  
581 *Developmental Cell* 46 (5): 651-667.e10. <https://doi.org/10.1016/j.devcel.2018.07.025>.
- 582 Griswold, Michael D. 2018. "50 Years of Spermatogenesis: Sertoli Cells and Their  
583 Interactions with Germ Cells." *Biology of Reproduction* 99 (1): 87–100.  
584 <https://doi.org/10.1093/biolre/ioy027>.
- 585 Guerrero-Bosagna, Carlos, Marina Savenkova, Md Muksitul Haque, Eric Nilsson, and  
586 Michael K. Skinner. 2013. "Environmentally Induced Epigenetic Transgenerational  
587 Inheritance of Altered Sertoli Cell Transcriptome and Epigenome: Molecular Etiology of  
588 Male Infertility." *PLoS ONE* 8 (3): e59922.  
589 <https://doi.org/10.1371/journal.pone.0059922>.
- 590 Kaur, Gurvinder, Kandis Wright, Payal Mital, Taylor Hibler, Jonathan M Miranda, Lea Ann  
591 Thompson, Katelyn Halley, and Jannette M Dufour. 2020. "Neonatal Pig Sertoli Cells

- 592 Survive Xenotransplantation by Creating an Immune Modulatory Environment Involving  
593 CD4 and CD8 Regulatory T Cells.” *Cell Transplantation* 29: 963689720947102.  
594 <https://doi.org/10.1177/0963689720947102>.
- 595 Krueger, F. 2012. “Trim Galore: A Wrapper Tool around Cutadapt and FastQC to  
596 Consistently Apply Quality and Adapter Trimming to FastQ Files, with Some Extra  
597 Functionality for MspI-Digested RRBS-Type (Reduced Representation Bisulfite-Seq)  
598 Libraries.” Available at: <https://www.Bioinformatics.Babraham>. 2012.
- 599 Luo, Dandan, Meijie Zhang, Xiaohui Su, Luna Liu, Xinli Zhou, Xiujuan Zhang, Dongmei  
600 Zheng, Chunxiao Yu, and Qingbo Guan. 2020. “High Fat Diet Impairs Spermatogenesis  
601 by Regulating Glucose and Lipid Metabolism in Sertoli Cells.” *Life Sciences* 257  
602 (September): 118028. <https://doi.org/10.1016/j.lfs.2020.118028>.
- 603 Mächler, Philipp, Matthias T Wyss, Maha Elsayed, Jillian Stobart, Robin Gutierrez,  
604 Alexandra von Faber-Castell, Vincens Kaelin, et al. 2016. “In Vivo Evidence for a  
605 Lactate Gradient from Astrocytes to Neurons.” *Cell Metabolism* 23 (1): 94–102.  
606 <https://doi.org/10.1016/j.cmet.2015.10.010>.
- 607 Mäkelä, Juho-Antti, and Robin M Hobbs. 2019. “Molecular Regulation of Spermatogonial  
608 Stem Cell Renewal and Differentiation.” *Reproduction (Cambridge, England)* 158 (5):  
609 R169–87. <https://doi.org/10.1530/REP-18-0476>.
- 610 Mancuso, Francesca, Mario Calvitti, Domenico Milardi, Giuseppe Grande, Giulia Falabella,  
611 Iva Arato, Stefano Giovagnoli, et al. 2018. “Testosterone and FSH Modulate Sertoli Cell  
612 Extracellular Secretion: Proteomic Analysis.” *Molecular and Cellular Endocrinology* 476  
613 (November): 1–7. <https://doi.org/10.1016/j.mce.2018.04.001>.
- 614 Marreiros, Bruno C, Filipa Calisto, Paulo J Castro, Afonso M Duarte, Filipa V Sena, Andreia  
615 F Silva, Filipe M Sousa, Miguel Teixeira, Patrícia N Refojo, and Manuela M Pereira.  
616 2016. “Exploring Membrane Respiratory Chains.” *Biochimica et Biophysica Acta* 1857  
617 (8): 1039–67. <https://doi.org/10.1016/j.bbabi.2016.03.028>.

- 618 Miettinen, Teemu P, and Mikael Björklund. 2017. "Mitochondrial Function and Cell Size: An  
619 Allometric Relationship." *Trends in Cell Biology* 27 (6): 393–402.  
620 <https://doi.org/10.1016/j.tcb.2017.02.006>.
- 621 Nolfi-Donagan, Deirdre, Andrea Braganza, and Sruti Shiva. 2020. "Mitochondrial Electron  
622 Transport Chain: Oxidative Phosphorylation, Oxidant Production, and Methods of  
623 Measurement." *Redox Biology* 37 (October): 101674.  
624 <https://doi.org/10.1016/j.redox.2020.101674>.
- 625 Oliveira, Vanessa Staldoni de, Allisson Jhonatan Gomes Castro, Juliana Tonietto  
626 Domingues, Ariane Zamoner Pacheco de Souza, Débora da Luz Scheffer, Alexandra  
627 Latini, Carlos Henrique Lemos Soares, Glen Van Der Kraak, and Fátima Regina Mena  
628 Barreto Silva. 2020. "A Brazilian Pulp and Paper Mill Effluent Disrupts Energy  
629 Metabolism in Immature Rat Testis and Alters Sertoli Cell Secretion and Mitochondrial  
630 Activity." *Animal Reproduction* 17 (2): e20190116. [https://doi.org/10.1590/1984-3143-](https://doi.org/10.1590/1984-3143-AR2019-0116)  
631 [AR2019-0116](https://doi.org/10.1590/1984-3143-AR2019-0116).
- 632 Patgiri, Anupam, Owen S. Skinner, Yusuke Miyazaki, Grigorij Schleifer, Eizo Marutani,  
633 Hardik Shah, Rohit Sharma, et al. 2020. "An Engineered Enzyme That Targets  
634 Circulating Lactate to Alleviate Intracellular NADH:NAD<sup>+</sup> Imbalance." *Nature*  
635 *Biotechnology* 38 (3): 309–13. <https://doi.org/10.1038/s41587-019-0377-7>.
- 636 Patro, Rob, Geet Duggal, Michael I Love, Rafael A Irizarry, and Carl Kingsford. 2017.  
637 "Salmon Provides Fast and Bias-Aware Quantification of Transcript Expression." *Nature*  
638 *Methods* 14 (4): 417–19. <https://doi.org/10.1038/nmeth.4197>.
- 639 Raudvere, Uku, Liis Kolberg, Ivan Kuzmin, Tambet Arak, Priit Adler, Hedi Peterson, and  
640 Jaak Vilo. 2019. "G:Profiler: A Web Server for Functional Enrichment Analysis and  
641 Conversions of Gene Lists (2019 Update)." *Nucleic Acids Research* 47 (W1): W191–  
642 98. <https://doi.org/10.1093/nar/gkz369>.
- 643 Rebourcet, Diane, Junxi Wu, Lyndsey Cruickshanks, Sarah E Smith, Laura Milne,

- 644 Anuruddika Fernando, Robert J Wallace, et al. 2016. "Sertoli Cells Modulate Testicular  
645 Vascular Network Development, Structure, and Function to Influence Circulating  
646 Testosterone Concentrations in Adult Male Mice." *Endocrinology* 157 (6): 2479–88.  
647 <https://doi.org/10.1210/en.2016-1156>.
- 648 Regueira, Mariana, Agostina Gorga, Gustavo Marcelo Rindone, Eliana Herminia Pellizzari,  
649 Selva Beatriz Cigorraga, Maria Noel Galardo, Maria Fernanda Riera, and Silvina  
650 Beatriz Meroni. 2018. "Apoptotic Germ Cells Regulate Sertoli Cell Lipid Storage and  
651 Fatty Acid Oxidation." *Reproduction (Cambridge, England)* 156 (6): 515–25.  
652 <https://doi.org/10.1530/REP-18-0181>.
- 653 Ritchie, Matthew E, Belinda Phipson, Di Wu, Yifang Hu, Charity W Law, Wei Shi, and  
654 Gordon K Smyth. 2015. "Limma Powers Differential Expression Analyses for RNA-  
655 Sequencing and Microarray Studies." *Nucleic Acids Research* 43 (7): e47.  
656 <https://doi.org/10.1093/nar/gkv007>.
- 657 Robinson, Mark D, and Alicia Oshlack. 2010. "A Scaling Normalization Method for  
658 Differential Expression Analysis of RNA-Seq Data." *Genome Biology* 11 (3): R25.  
659 <https://doi.org/10.1186/gb-2010-11-3-r25>.
- 660 Rotgers, E, S Cisneros-Montalvo, K Jahnukainen, J Sandholm, J Toppari, and M Nurmio.  
661 2015. "A Detailed Protocol for a Rapid Analysis of Testicular Cell Populations Using  
662 Flow Cytometry." *Andrology* 3 (5): 947–55. <https://doi.org/10.1111/andr.12066>.
- 663 Ruigrok, S R, K Yim, T L Emmerzaal, B Geenen, N Stöberl, J L den Blaauwen, M R Abbink,  
664 et al. 2021. "Effects of Early-Life Stress on Peripheral and Central Mitochondria in Male  
665 Mice across Ages." *Psychoneuroendocrinology* 132 (October): 105346.  
666 <https://doi.org/10.1016/j.psyneuen.2021.105346>.
- 667 Sadler-Riggelman, Ingrid, Rachel Klukovich, Eric Nilsson, Daniel Beck, Yeming Xie, Wei  
668 Yan, and Michael K Skinner. 2019. "Epigenetic Transgenerational Inheritance of Testis  
669 Pathology and Sertoli Cell Epimutations: Generational Origins of Male Infertility."

- 670 *Environmental Epigenetics* 5 (3): dvz013. <https://doi.org/10.1093/eep/dvz013>.
- 671 Sajadi, Ensieh, Sara Dadras, Mohammad Bayat, Shabnam Abdi, Hamid Nazarian, Sanaz  
672 Ziaiepour, Fatemeh Mazini, et al. 2019. "Impaired Spermatogenesis Associated with  
673 Changes in Spatial Arrangement of Sertoli and Spermatogonial Cells Following  
674 Induced Diabetes." *Journal of Cellular Biochemistry* 120 (10): 17312–25.  
675 <https://doi.org/10.1002/jcb.28995>.
- 676 Sarkar, D, and S K Singh. 2017. "Neonatal Hypothyroidism Affects Testicular Glucose  
677 Homeostasis through Increased Oxidative Stress in Prepubertal Mice: Effects on  
678 GLUT3, GLUT8 and Cx43." *Andrology* 5 (4): 749–62.  
679 <https://doi.org/10.1111/andr.12363>.
- 680 Scarpino, Stefania, Anna Rita Morena, Cecilia Petersen, Berit Frøysa, Olle Söder, and Carla  
681 Boitani. 1998. "A Rapid Method of Sertoli Cell Isolation by DSA Lectin, Allowing Mitotic  
682 Analyses." *Molecular and Cellular Endocrinology* 146 (1–2): 121–27.  
683 [https://doi.org/10.1016/S0303-7207\(98\)00190-7](https://doi.org/10.1016/S0303-7207(98)00190-7).
- 684 Schindelin, Johannes, Ignacio Arganda-Carreras, Erwin Frise, Verena Kaynig, Mark Longair,  
685 Tobias Pietzsch, Stephan Preibisch, et al. 2012. "Fiji: An Open-Source Platform for  
686 Biological-Image Analysis." *Nature Methods* 9 (7): 676–82.  
687 <https://doi.org/10.1038/nmeth.2019>.
- 688 Sharpe, Richard M, Chris McKinnell, Catrina Kivlin, and Jane S Fisher. 2003. "Proliferation  
689 and Functional Maturation of Sertoli Cells, and Their Relevance to Disorders of Testis  
690 Function in Adulthood." *Reproduction (Cambridge, England)* 125 (6): 769–84.  
691 <https://doi.org/10.1530/rep.0.1250769>.
- 692 Steenwyk, Gretchen van, Katharina Gapp, Ali Jawaid, Pierre-Luc Germain, Francesca  
693 Manuella, Deepak K Tanwar, Nicola Zamboni, et al. 2020. "Involvement of Circulating  
694 Factors in the Transmission of Paternal Experiences through the Germline." *The EMBO  
695 Journal* 39 (23): e104579. <https://doi.org/10.15252/embj.2020104579>.

- 696 Supek, Fran, Matko Bošnjak, Nives Škunca, and Tomislav Šmuc. 2011. "REVIGO  
697 Summarizes and Visualizes Long Lists of Gene Ontology Terms." *PloS One* 6 (7):  
698 e21800. <https://doi.org/10.1371/journal.pone.0021800>.
- 699 Tian, Pengxiang, Zhiming Zhao, Yanli Fan, Na Cui, Baojun Shi, and Guimin Hao. 2021.  
700 "Changes in Expressions of Spermatogenic Marker Genes and Spermatogenic Cell  
701 Population Caused by Stress." *Frontiers in Endocrinology* 12: 584125.  
702 <https://doi.org/10.3389/fendo.2021.584125>.
- 703 Titov, Denis V, Valentin Craacan, Russell P Goodman, Jun Peng, Zenon Grabarek, and  
704 Vamsi K Mootha. 2016. "Complementation of Mitochondrial Electron Transport Chain  
705 by Manipulation of the NAD<sup>+</sup>/NADH Ratio." *Science (New York, N. Y.)* 352 (6282):  
706 231–35. <https://doi.org/10.1126/science.aad4017>.
- 707 Tsuji, Kunikazu, Miyoko Ojima, Koji Otabe, Masafumi Horie, Hideyuki Koga, Ichiro Sekiya,  
708 and Takeshi Muneta. 2017. "Effects of Different Cell-Detaching Methods on the Viability  
709 and Cell Surface Antigen Expression of Synovial Mesenchymal Stem Cells." *Cell*  
710 *Transplantation* 26 (6): 1089–1102. <https://doi.org/10.3727/096368917X694831>.
- 711 Wagle, J R, J J Heindel, A Steinberger, and B M Sanborn. 1986. "Effect of Hypotonic  
712 Treatment on Sertoli Cell Purity and Function in Culture." *In Vitro Cellular &*  
713 *Developmental Biology: Journal of the Tissue Culture Association* 22 (6): 325–31.  
714 <https://doi.org/10.1007/BF02623406>.
- 715 Wong, Wah J, and Yusuf S Khan. 2021. "Histology, Sertoli Cell." In . Treasure Island (FL).
- 716 Zhang, Li-Li, Jing Ma, Bo Yang, Jie Zhao, Bin-Yuan Yan, Yuan-Qiang Zhang, and Wei Li.  
717 2018. "Interference with Lactate Metabolism by Mmu-MiR-320-3p via Negatively  
718 Regulating GLUT3 Signaling in Mouse Sertoli Cells." *Cell Death & Disease* 9 (10): 964.  
719 <https://doi.org/10.1038/s41419-018-0958-2>.
- 720 Zimmermann, Celine, Isabelle Stevant, Christelle Borel, Beatrice Conne, Jean-Luc Pitetti,  
721 Pierre Calvel, Henrik Kaessmann, Bernard Jegou, Frederic Chalmel, and Serge Nef.

722 2015. “Research Resource: The Dynamic Transcriptional Profile of Sertoli Cells during  
723 the Progression of Spermatogenesis.” *Molecular Endocrinology (Baltimore, Md.)* 29 (4):  
724 627–42. <https://doi.org/10.1210/me.2014-1356>.

725 Zomer, Helena D, and Prabhakara P Reddi. 2020a. “Characterization of Rodent Sertoli Cell  
726 Primary Cultures.” *Molecular Reproduction and Development* 87 (8): 857–70.  
727 <https://doi.org/10.1002/mrd.23402>.

728 ———. 2020b. “Mouse Sertoli Cells Isolation by Lineage Tracing and Sorting.” *Molecular*  
729 *Reproduction and Development* 87 (8): 871–79. <https://doi.org/10.1002/mrd.23406>.

730

731



## 732 Supporting information

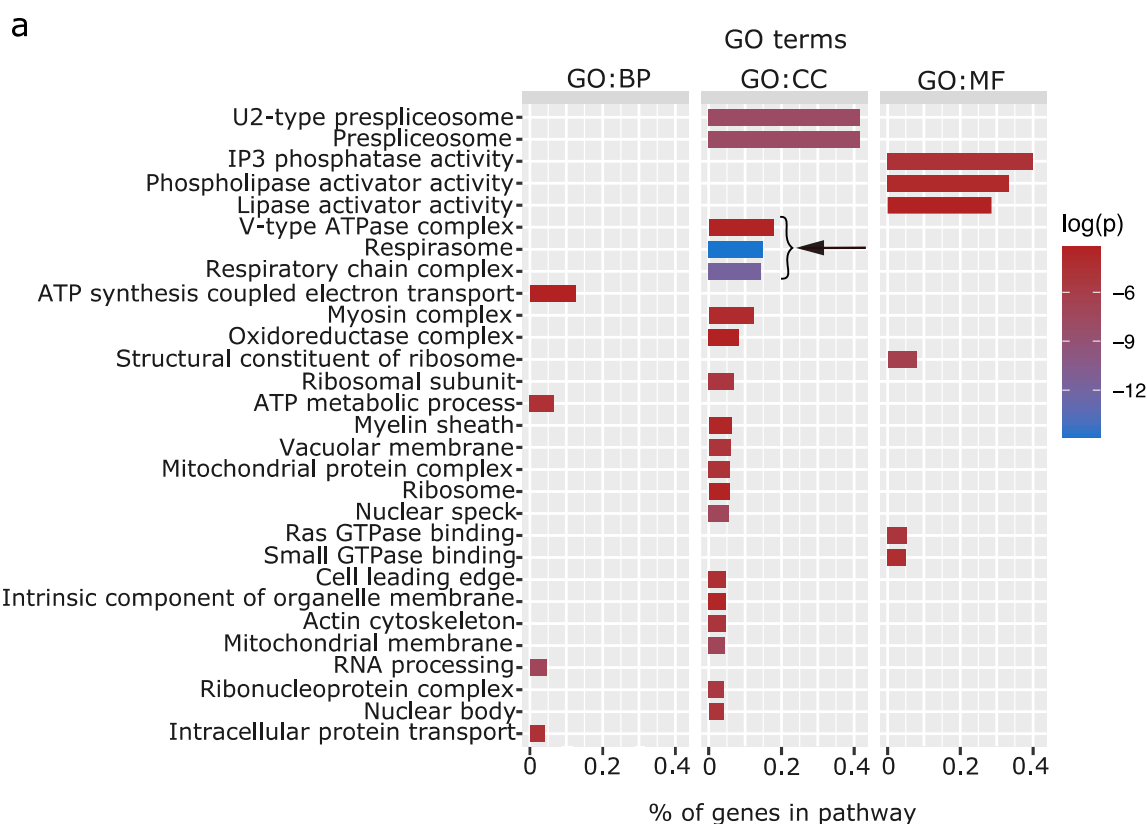

733

734 **S1 Fig. Enriched GO terms of altered genes in MSUS Sertoli cells.** (a) Enriched GO  
 735 pathways of significantly altered genes ( $p < 0.05$ ) in MSUS mouse Sertoli cells detected by  
 736 RNA sequencing. Ratio of genes per pathway is given on the x-axis and log of p-value ( $\log(p)$ )  
 737 is indicated on a color scale. Bracket and arrow indicate mitochondrially related pathways. BP:  
 738 biological process; CC: cellular component; MF: molecular function

739

740

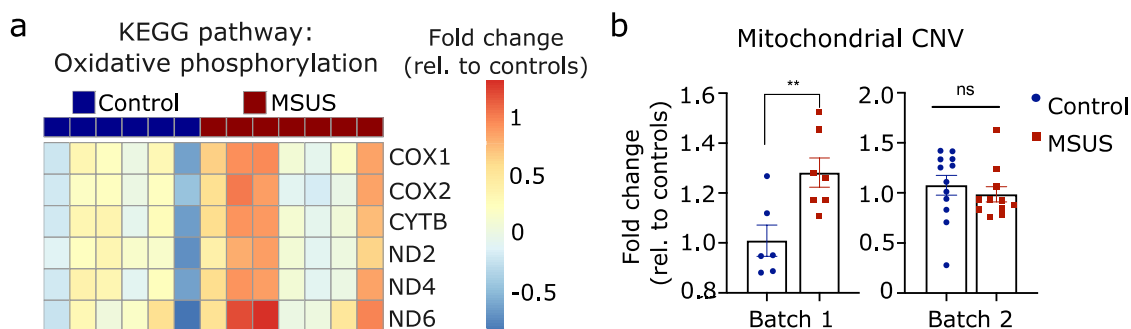

741

742 **S2 Fig. High variability in mitochondrially encoded genes and mitochondrial CNV in**

743 **batch 1 Sertoli cells.** (a) Heatmap of altered mitochondrially encoded genes of KEGG

744 pathway "oxidative phosphorylation". Fold change relative to controls is indicated in the color

745 scale. (b) Fold changes in mitochondrial CNV of MSUS compared to control Sertoli cells of

746 mouse batches 1 and 2. Error bars: mean  $\pm$  SEM; \*\* = p<0.01, student's t-test.

747

748

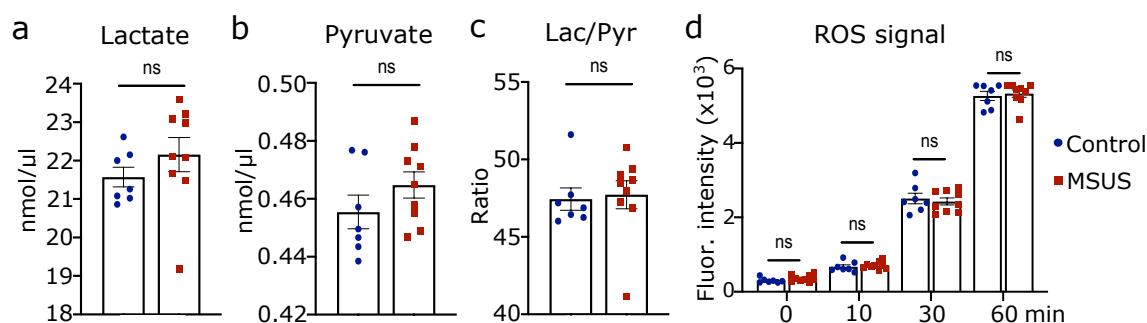

749

750 **S3 Fig. Characterization of lactate-to-pyruvate ratio and ROS production after MSUS**

751 **serum exposure in primary Sertoli cells.** (a) Lactate and (b) pyruvate levels (in nmol/ $\mu$ l) in

752 primary Sertoli cell medium after 24h of serum exposure. (c) Ratio of lactate to pyruvate and

753 (d) ROS fluorescent signal in primary Sertoli cells after serum exposure. Controls, n=7; MSUS,

754 n=9 for all graphs; error bars: mean  $\pm$  SEM; ns=not significant, student's t-test.

755

| A RAW COUNTS  | Before |      | Haploid |      | Diploid |      | Tetraploid |      | highFSC |      | lowFSC |      | highAPC |      | lowAPC |      |
|---------------|--------|------|---------|------|---------|------|------------|------|---------|------|--------|------|---------|------|--------|------|
|               | VIM    | DAPI | VIM     | DAPI | VIM     | DAPI | VIM        | DAPI | VIM     | DAPI | VIM    | DAPI | VIM     | DAPI | VIM    | DAPI |
| Replicate 1.1 | 1      | 28   | 0       | 34   | 7       | 32   | 1          | 17   | 13      | 31   | 0      | 25   | 10      | 11   | 1      | 9    |
| Replicate 1.2 | 0      | 18   | 0       | 25   | 3       | 15   | 0          | 50   | 5       | 21   | 1      | 15   | 5       | 6    | 0      | 10   |
| Replicate 1.3 | 0      | 23   | 0       | 12   | 1       | 20   | 2          | 60   | 6       | 19   | 3      | 40   | 5       | 7    | 0      | 10   |
| Replicate 1.4 |        |      |         |      |         |      |            |      |         |      |        |      | 5       | 6    | 0      | 17   |
| Replicate 1.5 |        |      |         |      |         |      |            |      |         |      |        |      | 10      | 12   | 0      | 13   |
| Replicate 1.6 |        |      |         |      |         |      |            |      |         |      |        |      | 9       | 10   |        |      |
| Replicate 2.1 | 0      | 20   | 0       | 16   | 1       | 10   | 1          | 16   | 27      | 31   | 0      | 29   | 53      | 56   | 1      | 33   |
| Replicate 2.2 | 1      | 21   | 0       | 23   | 3       | 31   | 0          | 22   | 13      | 16   | 0      | 23   | 44      | 46   | 1      | 25   |
| Replicate 2.3 | 0      | 23   | 0       | 13   | 3       | 11   | 0          | 33   | 13      | 16   | 2      | 12   | 26      | 28   | 0      | 19   |
| Replicate 2.4 |        |      |         |      | 2       | 10   |            |      |         |      | 1      | 23   |         |      |        |      |
| Replicate 3.1 | 0      | 38   | 0       | 19   | 3       | 19   | 0          | 41   | 4       | 28   | 0      | 32   | 9       | 10   | 2      | 29   |
| Replicate 3.2 | 1      | 36   | 0       | 13   | 3       | 19   | 2          | 50   | 5       | 15   | 1      | 26   | 6       | 8    | 0      | 16   |
| Replicate 3.3 | 1      | 48   | 0       | 13   | 2       | 14   | 1          | 61   | 2       | 9    | 0      | 29   | 10      | 11   |        |      |
| Replicate 3.4 |        |      | 0       | 48   | 9       | 41   |            |      | 3       | 17   | 1      | 29   | 24      | 30   | 1      | 22   |
| Replicate 3.5 |        |      |         |      |         |      |            |      | 5       | 20   |        |      | 12      | 13   |        |      |
| Replicate 4.1 | 1      | 31   | 0       | 12   | 2       | 20   | 0          | 63   | 3       | 17   | 1      | 36   | 15      | 17   | 0      | 24   |
| Replicate 4.2 | 1      | 21   | 0       | 13   | 4       | 26   | 1          | 64   | 2       | 15   | 3      | 41   | 16      | 18   |        |      |
| Replicate 4.3 | 1      | 28   | 0       | 15   | 2       | 31   | 0          | 36   | 1       | 10   | 3      | 21   | 16      | 18   | 1      | 15   |
| Replicate 4.4 | 0      | 29   | 0       | 14   | 2       | 19   |            |      | 1       | 8    |        |      | 16      | 17   | 0      | 23   |

  

| B #CELLS COUNTED | Before     | Haploid    | Diploid    | Tetrapl.   | highFSC    | lowFSC     | highAPC    | lowAPC     |
|------------------|------------|------------|------------|------------|------------|------------|------------|------------|
| Replicate 1      | 69         | 71         | 67         | 127        | 71         | 80         | 52         | 59         |
| Replicate 2      | 64         | 52         | 62         | 71         | 63         | 87         | 130        | 77         |
| Replicate 3      | 122        | 93         | 93         | 152        | 89         | 116        | 72         | 67         |
| Replicate 4      | 109        | 54         | 96         | 163        | 50         | 98         | 70         | 62         |
| <b>TOTAL</b>     | <b>364</b> | <b>270</b> | <b>318</b> | <b>513</b> | <b>273</b> | <b>381</b> | <b>324</b> | <b>265</b> |

  

| C PERCENTAGES           | Before        | Haploid       | Diploid       | Tetrapl.      | highFSC       | lowFSC        | highAPC       | lowAPC        |
|-------------------------|---------------|---------------|---------------|---------------|---------------|---------------|---------------|---------------|
| Replicate 1             | 0.014         | 0.000         | 0.164         | 0.024         | 0.338         | 0.050         | 0.846         | 0.017         |
| Replicate 2             | 0.016         | 0.000         | 0.145         | 0.014         | 0.841         | 0.034         | 0.946         | 0.026         |
| Replicate 3             | 0.016         | 0.000         | 0.183         | 0.020         | 0.213         | 0.017         | 0.847         | 0.045         |
| Replicate 4             | 0.028         | 0.000         | 0.104         | 0.006         | 0.140         | 0.071         | 0.900         | 0.016         |
| <b>weighted Average</b> | <b>0.0192</b> | <b>0.0000</b> | <b>0.1478</b> | <b>0.0156</b> | <b>0.3773</b> | <b>0.0420</b> | <b>0.8981</b> | <b>0.0264</b> |
| <b>weighted SD</b>      | <b>0.0063</b> | <b>0.0000</b> | <b>0.0363</b> | <b>0.0081</b> | <b>0.3036</b> | <b>0.0241</b> | <b>0.0508</b> | <b>0.0132</b> |

756

757 **S1 Table. Counts of vimentin-positive cells in isolated FACS populations.** (A) Raw  
758 counts of each isolated fraction (before FACS, haploid, diploid, tetraploid, high FSC, low  
759 FSC, high APC and low APC) for 4 individual mice (4 replicates). Always at least 3 individual  
760 pictures per replicate were taken and counted. (B) Total number of cells counted for each  
761 replicate and each isolated fraction. (C) Percentages of vimentin positive cells out of all  
762 DAPI positive cells for each replicate and isolated fraction. Weighted average and weighted  
763 standard deviation (SD) were calculated from percentages.

| Source | Term name                                                         | Term ID            | Adj. P-value |
|--------|-------------------------------------------------------------------|--------------------|--------------|
| KEGG   | Oxidative phosphorylation                                         | KEGG:00190         | 1.08E-08     |
| GO:CC  | respirasome                                                       | GO:0070469         | 3.40E-07     |
| WP     | Electron Transport Chain                                          | WP:WP295           | 6.54E-07     |
| GO:CC  | respiratory chain complex                                         | GO:0098803         | 7.44E-06     |
| GO:CC  | mitochondrial respirasome                                         | GO:0005746         | 5.50E-05     |
| HP     | Atrophy/Degeneration affecting the cerebrum                       | HP:0007369         | 0.00025262   |
| KEGG   | Parkinson disease                                                 | KEGG:05012         | 0.00025719   |
| GO:CC  | presplicesome                                                     | GO:0071010         | 0.00035071   |
| GO:CC  | U2-type presplicesome                                             | GO:0071004         | 0.00035071   |
| HP     | Protruding ear                                                    | HP:0000411         | 0.00040705   |
| HP     | Cerebral atrophy                                                  | HP:0002059         | 0.00048261   |
| GO:CC  | nuclear speck                                                     | GO:0016607         | 0.00070203   |
| HP     | Centrocecal scotoma                                               | HP:0000576         | 0.00070315   |
| HP     | Brain atrophy                                                     | HP:0012444         | 0.00071712   |
| GO:BP  | RNA processing                                                    | GO:0006396         | 0.00075713   |
| GO:CC  | mitochondrial membrane                                            | GO:0031966         | 0.00084584   |
| KEGG   | Non-alcoholic fatty liver disease (NAFLD)                         | KEGG:04932         | 0.00096033   |
| KEGG   | Thermogenesis                                                     | KEGG:04714         | 0.00140948   |
| REAC   | NMD independent of the Exon Junction Complex (EJC)                | REAC:R-MMU-975956  | 0.00180478   |
| GO:MF  | structural constituent of ribosome                                | GO:0003735         | 0.00184033   |
| HP     | Ventricular preexcitation                                         | HP:0004309         | 0.00292897   |
| REAC   | Golgi Associated Vesicle Biogenesis                               | REAC:R-MMU-432722  | 0.00323917   |
| HP     | Stroke-like episode                                               | HP:0002401         | 0.00353918   |
| KEGG   | Huntington disease                                                | KEGG:05016         | 0.00361302   |
| GO:CC  | mitochondrial envelope                                            | GO:0005740         | 0.00380836   |
| HP     | Atrophy/Degeneration affecting the central nervous system         | HP:0007367         | 0.00387525   |
| HP     | Hemianopia                                                        | HP:0012377         | 0.00403308   |
| GO:CC  | ribonucleoprotein complex                                         | GO:1990904         | 0.00446442   |
| GO:CC  | mitochondrial inner membrane                                      | GO:0005743         | 0.00466444   |
| GO:CC  | ribosomal subunit                                                 | GO:0044391         | 0.00525599   |
| HP     | Episodic vomiting                                                 | HP:0002572         | 0.00565689   |
| GO:MF  | Ras GTPase binding                                                | GO:0017016         | 0.00675107   |
| GO:CC  | actin cytoskeleton                                                | GO:0015629         | 0.00686765   |
| HP     | Leber optic atrophy                                               | HP:0001112         | 0.00691632   |
| GO:CC  | vacuolar membrane                                                 | GO:0005774         | 0.00697451   |
| GO:CC  | nuclear body                                                      | GO:0016604         | 0.00724207   |
| GO:CC  | inner mitochondrial membrane protein complex                      | GO:0098800         | 0.00751333   |
| GO:CC  | mitochondrial protein complex                                     | GO:0098798         | 0.00799944   |
| HP     | Generalized-onset seizure                                         | HP:0002197         | 0.00809124   |
| KEGG   | Ribosome                                                          | KEGG:03010         | 0.00861026   |
| HP     | Abnormal facial expression                                        | HP:0005346         | 0.00870291   |
| GO:MF  | inositol triphosphate phosphatase activity                        | GO:0046030         | 0.00895213   |
| REAC   | SRP-dependent cotranslational protein targeting to membrane       | REAC:R-MMU-1799339 | 0.00933222   |
| WP     | Cytoplasmic Ribosomal Proteins                                    | WP:WP163           | 0.01034732   |
| GO:BP  | intracellular protein transport                                   | GO:0006886         | 0.01035823   |
| GO:CC  | cytosolic ribosome                                                | GO:0022626         | 0.01051453   |
| GO:BP  | ATP metabolic process                                             | GO:0046034         | 0.01086537   |
| HP     | Decreased facial expression                                       | HP:0004673         | 0.01095364   |
| GO:CC  | organelle inner membrane                                          | GO:0019866         | 0.0113213    |
| GO:CC  | cell leading edge                                                 | GO:0031252         | 0.01132506   |
| HP     | Retinal telangiectasia                                            | HP:0007763         | 0.01219897   |
| HP     | Wolff-Parkinson-White syndrome                                    | HP:0001716         | 0.01219897   |
| HP     | Mitochondrial respiratory chain defects                           | HP:0200125         | 0.01219897   |
| HP     | Central retinal vessel vascular tortuosity                        | HP:0007768         | 0.01237967   |
| HP     | Retinal arterial tortuosity                                       | HP:0000631         | 0.01237967   |
| REAC   | NMD enhanced by the Exon Junction Complex (EJC)                   | REAC:R-MMU-975957  | 0.01327594   |
| REAC   | Nonsense-Mediated Decay (NMD)                                     | REAC:R-MMU-927802  | 0.01327594   |
| GO:MF  | small GTPase binding                                              | GO:0031267         | 0.01330476   |
| GO:CC  | myosin complex                                                    | GO:0016459         | 0.0185582    |
| HP     | Abnormal cerebellum morphology                                    | HP:0001317         | 0.02010541   |
| GO:MF  | phospholipase activator activity                                  | GO:0016004         | 0.02050276   |
| HP     | Psychotic episodes                                                | HP:0000725         | 0.02072004   |
| GO:CC  | lysosomal membrane                                                | GO:0005765         | 0.02121812   |
| GO:CC  | lytic vacuole membrane                                            | GO:0098852         | 0.02121812   |
| REAC   | Formation of a pool of free 40S subunits                          | REAC:R-MMU-72689   | 0.02157739   |
| TF     | Factor: HIF2A; motif: NTACGTGMN                                   | TF:M10221          | 0.02244509   |
| TF     | Factor: HIF2A; motif: NTACGTGMN; match class: 0                   | TF:M10221_0        | 0.02244509   |
| HP     | Abnormality of hindbrain morphology                               | HP:0011282         | 0.02306827   |
| HP     | Abnormality of the metencephalon                                  | HP:0011283         | 0.02306827   |
| HP     | Arterial tortuosity                                               | HP:0005116         | 0.02425621   |
| WP     | Oxidative phosphorylation                                         | WP:WP1248          | 0.02791317   |
| REAC   | trans-Golgi Network Vesicle Budding                               | REAC:R-MMU-199992  | 0.02794761   |
| HP     | Mitochondrial inheritance                                         | HP:0001427         | 0.02868439   |
| HP     | Abnormal adipose tissue morphology                                | HP:0009124         | 0.02908822   |
| REAC   | Membrane Trafficking                                              | REAC:R-MMU-199991  | 0.02950059   |
| GO:CC  | myelin sheath                                                     | GO:0043209         | 0.02989145   |
| GO:CC  | large ribosomal subunit                                           | GO:0015934         | 0.03002648   |
| GO:CC  | intrinsic component of organelle membrane                         | GO:0031300         | 0.03046085   |
| HP     | Vascular tortuosity                                               | HP:0004948         | 0.03313985   |
| GO:CC  | proton-transporting V-type ATPase complex                         | GO:0033176         | 0.03442199   |
| HP     | Ragged-red muscle fibers                                          | HP:0003200         | 0.03526572   |
| GO:CC  | ribosome                                                          | GO:0005840         | 0.03672133   |
| REAC   | Translation                                                       | REAC:R-MMU-72766   | 0.03678056   |
| GO:MF  | lipase activator activity                                         | GO:0060229         | 0.04028618   |
| GO:BP  | ATP synthesis coupled electron transport                          | GO:0042773         | 0.04076191   |
| GO:CC  | oxidoreductase complex                                            | GO:1990204         | 0.0409364    |
| HP     | Aplasia/Hypoplasia of the cerebellum                              | HP:0007360         | 0.04094948   |
| GO:CC  | cytosolic large ribosomal subunit                                 | GO:0022625         | 0.04326678   |
| HP     | Developmental cataract                                            | HP:0000519         | 0.04328818   |
| REAC   | The citric acid (TCA) cycle and respiratory electron transport    | REAC:R-MMU-1428517 | 0.04505193   |
| KEGG   | Alzheimer disease                                                 | KEGG:05010         | 0.04541879   |
| REAC   | L13a-mediated translational silencing of Ceruloplasmin expression | REAC:R-MMU-156827  | 0.04912657   |

764

## 765 S2 Table. Summary of the over-representation analyses of significantly altered genes.

766 All significantly altered genes ( $p < 0.05$ ) in response to MSUS were used for over-

767 representation analyses using Gprofiler. The table shows the source, term name, term ID

768 and adjusted p-value for each significant pathway.

769

| A | Number | Group | Cage | Littercage |
|---|--------|-------|------|------------|
|   | 1      | MSUS  | 11   | 576        |
|   | 5      | MSUS  | 15   | 606        |
|   | 6      | MSUS  | 15   | 589        |
|   | 9      | CTRL  | 3    | 577        |
|   | 10     | CTRL  | 3    | 583        |
|   | 11     | MSUS  | 17   | 589        |
|   | 12     | CTRL  | 3    | 590        |
|   | 13     | MSUS  | 17   | 608        |
|   | 14     | CTRL  | 3    | 601        |
|   | 22     | CTRL  | 6    | 580        |
|   | 23     | MSUS  | 20   | 600        |
|   | 24     | CTRL  | 6    | 583        |
|   | 26     | MSUS  | 20   | 597        |

| B | Number | Group   | Cage | Littercage |
|---|--------|---------|------|------------|
|   | 1      | Control | 50   | 6          |
|   | 2      | MSUS    | 57   | 7          |
|   | 3      | Control | 50   | 18         |
|   | 9      | MSUS    | 61   | 8          |
|   | 10     | Control | 42   | 1          |
|   | 11     | MSUS    | 61   | 21         |
|   | 17     | Control | 51   | 6          |
|   | 18     | MSUS    | 62   | 8          |
|   | 19     | Control | 51   | 27         |
|   | 25     | MSUS    | 59   | 7          |
|   | 26     | Control | 45   | 1          |
|   | 27     | MSUS    | 59   | 19         |
|   | 33     | Control | 48   | 2          |
|   | 34     | MSUS    | 58   | 7          |
|   | 35     | Control | 48   | 18         |
|   | 41     | MSUS    | 54   | 4          |
|   | 42     | Control | 43   | 1          |
|   | 43     | MSUS    | 54   | 16         |
|   | 49     | Control | 47   | 2          |
|   | 50     | MSUS    | 55   | 4          |
|   | 51     | Control | 47   | 18         |
|   | 57     | MSUS    | 56   | 7          |
|   | 58     | Control | 44   | 1          |
|   | 59     | MSUS    | 56   | 16         |

| C | Number | Group | Cage | Littercage |
|---|--------|-------|------|------------|
|   | 9      | CTRL  | 3    | 577        |
|   | 10     | CTRL  | 3    | 583        |
|   | 11     | MSUS  | 17   | 589        |
|   | 12     | CTRL  | 3    | 590        |
|   | 13     | MSUS  | 17   | 608        |
|   | 14     | CTRL  | 3    | 601        |
|   | 15     | MSUS  | 17   | 578        |
|   | 16     | CTRL  | 6    | 596        |
|   | 17     | MSUS  | 17   | 581        |
|   | 18     | MSUS  | 13   | 576        |
|   | 19     | MSUS  | 13   | 579        |
|   | 20     | MSUS  | 13   | 588        |
|   | 21     | MSUS  | 13   | 606        |
|   | 22     | CTRL  | 6    | 580        |
|   | 23     | MSUS  | 20   | 600        |
|   | 24     | CTRL  | 6    | 583        |

770

771 **S3 Table. Information on mice used for experiments.** (A) Mice used for RNA sequencing  
 772 of Sertoli cells (Batch 1). (B) Mice used for Fluidigm RT-qPCR of Sertoli cells (Batch 2). (C)  
 773 Mice used for serum collection for in vitro experiments. The tables contain information on the  
 774 number (ID), group, cage, and litter cage.

775

| Gene    | primer_fw_sequence       | primer_rev_sequence       |
|---------|--------------------------|---------------------------|
| Actb    | ACAGCTTCTTTGCAGCTCCTTCG  | ATCGTCATCCATGGCGAACTGGTG  |
| Atp5f1  | AAGTGCCTCTTGGGCTGATTC    | AAGCACATAAGGTCCTGTTACACC  |
| Atp6ap1 | AGGCAATCTCCTTGTGACCAACG  | TCACATTGAAGGCCTGGATCTGG   |
| Atp6v1a | TGTCGGATATCAGCAGTCAGACC  | CACCAGTGATATGACTACCAACCC  |
| Atpv0c  | ACGAACAGCCTGACACATGCAC   | ACAATGGGCACTAGGACACTGC    |
| B2m     | ACATACGCCTGCAGAGTTAAGC   | TGCTTGATCACATGTCTCGATCCC  |
| COX1    | AAAGCCCACTTCGCCATCATATTC | AGCATCTGGGTAGTCTGAGTAGCG  |
| COX2    | AACCGAGTCGTTCTGCCAATAG   | TGATTTAGTCGGCCTGGGATGG    |
| Cox4i1  | TGAGCCTGATTGGCAAGAGAGC   | ACTCTTCAACAACACTCCCATGTGC |
| Cox5a   | CTGCATTGCGAGCATGTAGACG   | GGTCCTGCTTTGCTCTTAACAACC  |
| Cox6a1  | TCCGACCGGCTATGAAGATGAG   | AACCAGTGCTGTGGTCCCTTTG    |
| CYTB    | ACAAAGCCACCTTGACCCGATTC  | GCTAGGGCCGCGATAATAAATGG   |
| Hprt1   | GCGTCGTGATTAGCGATGATGAAC | CGAGCAAGTCTTTCAGTCCTGTCC  |
| ND2     | TGATTACTTCTGCCAGCCTGACC  | CGGTTTGTCTGCTAGGGTTGAG    |
| ND4     | GCACATGGCCTCACATCATCAC   | GCTGTGGATCCGTTCTGATGTTG   |
| ND6     | GTTATGTTGGAAGGAGGGATTGGG | CGCAAACAAGATCACCAGCTAC    |
| Ndufa1  | CAATCGCTACTATGTGTCCAAGGG | GCCTTCTAACAGGAACAGATGACC  |
| Ndufa9  | TCTAAGTCCTTGAGGAGCAAGGC  | ACGGCCGTATGATGATGGCTTC    |
| Ppa2    | TGACAAGGGAGCCATCAGTTGTG  | AGTGCAGTGGAAAGGGCTATCG    |
| Sdhc    | ACTGAATGGGATCCGACACTTGC  | ACAACACAGCAAGAACCACGAC    |
| Sdhd    | TCTGGTTCCAAGGCTGCATCTC   | CCAAGAGCAGAACACTGACAACCC  |
| Uqcr11  | TCTGCACATGCGTAGTGCTC     | GGCTGTGGGAATCCAGTTTCTG    |
| HK2     | GCCAGCCTCTCCTGATTTTAG    | GGGAACACAAAAGACCTCTTC     |
| ND1     | CTAGCAGAAACAAACCGGGC     | CCGGCTGCGTATTCTACGTT      |

776

777 **S4 Table. List of primer sequences.** The table includes information on the target genes,  
 778 forward primer and reverse primer sequences.

779
